# Supplementary material
Source: PubMed Central journal article supplement (PMC5833545)
Supplement: jama-319-27-s001.pdf [file jama-319-27-s001.pdf]

## Supplementary Online Content

Feldman TE, Reardon MJ, Rajagopal V, et al. Effect of mechanically expanded vs self-expanding transcatheter aortic valve replacement on mortality and major adverse clinical events in high-risk patients with aortic stenosis: the REPRISE III randomized clinical trial. *JAMA*. doi:10.1001/jama.2017.19132

**eAppendix.** Supplemental Methods and Results

**eTable 1.** REPRISE III Investigators and Study Support by Site Name

**eTable 2.** REPRISE III Committees, and Core Laboratories

**eTable 3.** REPRISE III Inclusion Criteria

**eTable 4.** REPRISE III Exclusion Criteria

**eTable 5.** Additional Measurements

**eTable 6.** Antiplatelet/Anticoagulant Medications

**eTable 7.** Hierarchical Testing of the Prespecified Safety and Effectiveness Endpoints in Alternative Patient Populations

**eTable 8.** Grades of Aortic Regurgitation or Paravalvular Leak Presented Over Time

**eTable 9.** Clinical Outcomes at 30 Days and 1 Year Post Procedure in the Implanted Patient Population

**eTable 10.** Functional Status Over Time

**eTable 11.** Neurological Assessment From Baseline Through 1 Year Post-Procedure

**eTable 12.** Effectiveness Endpoints in SEV-E vs MEV Patients

**eTable 13.** Paravalvular Leak in SEV-E vs MEV Patients

**eFigure 1.** Missing Data Sensitivity Analysis for the 1-Year Primary Effectiveness Endpoint for Inferiority Testing

**eFigure 2.** Missing Data Sensitivity Analysis for the 1-Year Primary Effectiveness Endpoint for Superiority Testing

**eFigure 3.** Patient Flow for the Secondary Endpoint Superiority Comparison

**eReferences**

This supplementary material has been provided by the authors to give readers additional information about their work.

## **eAppendix.** Supplemental Methods and Results

### **Study Design**

The REPRISE III trial also included a non-randomized roll-in phase for centers without previous experience implanting the Lotus Valve, a concurrent non-randomized nested registry of patients receiving the 21 mm Lotus Valve, and a subsequent non-randomized continued access study of US patients receiving a Lotus Valve after completion of RCT enrollment. The results from the randomized controlled trial are reported here.

The sponsor (Boston Scientific) performed the statistical analysis; the powered endpoints and all VARC safety endpoints were validated by an external statistician (John Gregson, PhD; London School of Hygiene & Tropical Medicine).

### **Randomization**

#### **REPRISE III Endpoints**

Additional measurements based on the VARC endpoints and definitions available at the time of trial start were collected peri- and post-procedure, at discharge or 7 days post-procedure (whichever comes first), 30 days, 6 months, and 1 year and will be collected annually for 5 years post index procedure, unless otherwise specified below.

- Safety endpoints adjudicated by an independent Clinical Events Committee (CEC):
  - Mortality: all-cause, cardiovascular, and non-cardiovascular
  - Stroke: disabling and non-disabling
  - Myocardial infarction (MI): periprocedural ( $\leq 72$  hours post index procedure) and spontaneous ( $> 72$  hours post index procedure)
  - Bleeding: life-threatening (or disabling) and major
  - Acute kidney injury ( $\leq 7$  days post index procedure): based on the AKIN System Stage 3 (including renal replacement therapy) or Stage 2
  - Major vascular complication
  - Repeat procedure for valve-related dysfunction (surgical or interventional therapy)
  - Hospitalization for valve-related symptoms or worsening congestive heart failure (NYHA class III or IV)
  - New permanent pacemaker implantation resulting from new or worsened conduction disturbances
  - New onset of atrial fibrillation or atrial flutter
  - Coronary obstruction: periprocedural ( $\leq 72$  hours post index procedure)
  - Ventricular septal perforation: periprocedural ( $\leq 72$  hours post index procedure)
  - Mitral apparatus damage: periprocedural ( $\leq 72$  hours post index procedure)
  - Cardiac tamponade: periprocedural ( $\leq 72$  hours post index procedure)
  - Prosthetic aortic valve malpositioning, including valve migration, valve embolization, or ectopic valve deployment
  - Transcatheter aortic valve (TAV)-in-TAV deployment

- Prosthetic aortic valve thrombosis
  - Prosthetic aortic valve endocarditis
- Device performance endpoints peri- and post-procedure.
  - Clinical procedural success at 30 days was defined as implantation of the study device in the absence of death, disabling stroke, major vascular complications, and life-threatening or major bleeding.
  - Procedural success (30 days), defined as absence of procedural mortality, correct positioning of a single transcatheter valve into the proper anatomical location, intended performance of the study device (effective orifice area [EOA] >0.9 cm<sup>2</sup> for BSA <1.6 m<sup>2</sup> and EOA >1.1 cm<sup>2</sup> for BSA ≥1.6 m<sup>2</sup> plus either a mean aortic valve gradient <20 mm Hg or a peak velocity <3m/sec, and no moderate or severe prosthetic valve aortic regurgitation) plus no serious adverse events at 30 days
  - Additional indications of prosthetic aortic valve performance as measured by transthoracic echocardiography and assessed by an independent core laboratory, including effective orifice area, mean and peak aortic gradients, peak aortic velocity, and grade of aortic regurgitation.
  - Modified device success at 30 days was reported for patients randomized and implanted with an assigned study device and defined as follows: absence of mortality with the originally implanted transcatheter valve in the proper anatomical location, no additional aortic valve procedures, and with the intended performance of the prosthetic valve (either a mean aortic valve gradient <20 mmHg or a peak velocity <3m/sec with no moderate or severe prosthetic valve aortic regurgitation).
  - Functional status as evaluated by the following:
    - 5-m gait speed test<sup>1</sup>
    - New York Heart Association (NYHA) classification
  - Neurological status as determined by the following:
    - Neurological physical exam by a neurologist, neurology fellow, neurology physician assistant, or neurology nurse practitioner at discharge and 1 year
    - National Institutes of Health Stroke Scale (NIHSS) at discharge and 1 year
    - Modified Rankin Scale (mRS) at all time points

The following additional measurements will be reported separately:

- Health status as evaluated by Kansas City Cardiomyopathy<sup>2</sup> and SF-12<sup>3</sup> Quality of Life questionnaires at baseline; 1 and 6 months; and 1, 3, and 5 years
- Resource utilization associated with the procedure and/or follow-up.

## Statistical Analyses

### Patient Analysis Sets

**Intent-to-Treat (ITT):** all patients who sign an Informed Consent Form, are enrolled in the trial, and are randomized, whether or not an assigned study device is implanted. Event rates are calculated post randomization.

**Implanted:** all subjects who sign an Informed Consent Form, are enrolled in the trial, and are implanted with the assigned, randomized study device (excludes cross-over subjects). Event rates are calculated post index procedure.

### Hierarchical Analysis of Primary and Secondary Endpoints

Testing of endpoints was carried out in a hierarchical manner in order to ensure the experiment-wise type I error rate was controlled. Testing was done in 3 steps with each step needing to reject the null hypothesis in order to proceed to the next step:

1. Test the primary safety endpoint and the primary hypothesis of the primary effectiveness endpoint. If non-inferiority is met for both, then step 2 was performed.
2. Test the secondary endpoint; if superiority is met, then step 3 was performed.
3. Test the secondary hypothesis of the primary effectiveness endpoint.

To test for superiority of the primary effectiveness endpoint, a chi-square test was used (in the ITT population) and superiority was concluded if  $P < .025$  which corresponded to the 2-sided upper 95% confidence bound on the difference between treatment groups (MEV – SEV) being less than 0. For this test, given enrollment of 912 patients (2:1 MEV:SEV) and 10% attrition, there is approximately 86% power to show superiority with the given expected rates.

For the primary and secondary endpoint analyses, site poolability and potential interactions between site and treatment were evaluated. Sites with 6 or fewer randomized patients were combined based on geographic location. There were no treatment by site interactions and no site effects for any of the three powered endpoints.

## Online Results

### Procedural outcomes

Repositioning (n=197) and retrieval (n=40) were successful in all MEV patients attempted. Repositioning could be performed in patients receiving EvolutR and was successful in all 35 patients attempted; retrieval was successful in 13 of 14 EvolutR patients.

### Tipping Point Analysis

The missing data sensitivity analyses using the tipping point approach were performed for the powered primary endpoints by imputing missing data in both treatment groups with all possible combinations of failures to identify tipping points that result in a change of statistical conclusion.

For the 30-day primary safety endpoint, 2 patients in the SEV group and 6 patients in the MEV group had missing data. The analysis showed that in the worst-case scenario where no SEV

patient and all MEV patients with missing 30-day primary safety endpoint had an event, the *P* value from the Farrington-Manning test would still be  $<.025$ . Thus, the conclusion of non-inferiority would not change.

For the 1-year primary effectiveness endpoint, 43 patients in the SEV group and 87 patients in the MEV group had missing data for the non-inferiority testing. eFigure 2 shows results of imputing the missing values. The white area represents outcomes where the *P* value from the Farrington-Manning test was  $<.025$  and the gray area represents outcomes that produced a *P* value  $\geq .025$ ; the lower right corner represents the tipping of non-inferiority statistical significance over to statistical non-significance. The analysis showed that if all SEV patients with missing primary effectiveness endpoint data did not have an event (0/43), then up to 87.4% (76/87) of the MEV patients with missing data could have had an event without changing the conclusion of non-inferiority. If all MEV patients with missing data had an event (100%; 87/87), then the non-inferiority conclusion would not change if 14.0% (6/43) or more of the SEV patients with missing data had an event. This analysis suggests the white area to grey area ratio is .99 to .01, approximately 99:1, implying that it is highly unlikely that the conclusion of the non-inferiority testing would have been different if the missing data were available.

eFigure 3 shows results of imputing the missing values for superiority testing of the 1-year primary effectiveness endpoint (43 patients in the SEV group and 87 patients in the MEV group with missing data). The white area represents outcomes where the *P* value from the Chi-square test was  $<.05$  and the gray area represents outcomes that produced a *P* value  $\geq .05$ . The lower right corner of eFigure 3 represents the tipping of superior statistical significance over to statistical non-significance. The analysis showed that if all SEV patients with missing primary effectiveness endpoint data did not have an event (0/43), then up to 23.0% (20/87) of the MEV patients with missing data could have had an event without changing the conclusion of superiority. If all MEV patients with missing data had an event (100%; 87/87), then the superiority conclusion would not change if 86.0% (37/43) or more of the SEV patients with missing data had an event. This analysis suggests the white area to grey area ratio is 0.68 to 0.32, approximately 2.1:1, implying the conclusion of superiority is unlikely to be changed.

To assess the robustness of the superiority testing of the primary effectiveness endpoint of all-cause mortality, disabling stroke and moderate or greater PVL through 1 year and the secondary endpoint of moderate or greater PVL at 1 year, imputation of missing PVL data was performed using the last available (non-missing) PVL value post-procedure for the missing 1-year PVL data. For the primary effectiveness endpoint, the calculated composite endpoint rate was 24.6% for CoreValve compared to 15.4% for Lotus with a *P* value of .001. For the secondary endpoint, the calculated rate of moderate or greater PVL was 7.9% for CoreValve compared to 0.8% for Lotus with a *P* value  $<.0001$ . Thus, the same superiority conclusion could be made for both endpoints.

### **Additional Measurements – Functional, Neurological, and Health Status**

The functional status of patients from baseline to 1 year is shown in eTable 10. There were no significant differences between the two cohorts at any time point.

| <b>eTable 1. REPRISE III Investigators and Study Support by Site Name</b>                            |                                                                                                                                                                                                                                                                                                                                                                                                                                                                             |
|------------------------------------------------------------------------------------------------------|-----------------------------------------------------------------------------------------------------------------------------------------------------------------------------------------------------------------------------------------------------------------------------------------------------------------------------------------------------------------------------------------------------------------------------------------------------------------------------|
| <b>Site</b>                                                                                          | <b>Study Team</b>                                                                                                                                                                                                                                                                                                                                                                                                                                                           |
| Abbott Northwestern Hospital<br>Minneapolis MN                                                       | Principal Investigators: Wesley Pedersen<br>Co-Principal Investigator: Benjamin Sun<br>Sub-investigators: Richard Bae, Frazier Ealesm, Robert Farivar, Thomas Flavin, Mario Goessl, Kevin Harris, Desmond Jay, Vibhu Kshetry, David Lin, Michael Mooney, Karol Mudy, Anil Poulouse, Paul Sorajja, Mark Young<br>Research Coordinators: Aisha Ahmed, Brittany Fitzpatrick, Kate Jappe, Karen Meyer, Pamela Morley, Sara Olson, Lauren Ware                                   |
| Aurora St. Luke's Medical Center                                                                     | Principal Investigators: Tanvir Bajwa<br>Co-Principal Investigator: Daniel O'Hair<br>Sub-investigators: Suhail Allaqaband, Paul Werner<br>Research Coordinators: Wendy Dunaj, Kathleen Behrens, Lindsay Biddick, Michelle Bennett, Deborah Waller, Anthony Chambers                                                                                                                                                                                                         |
| Baptist Cardiac and Vascular Institute<br>Miami FL                                                   | Principal Investigator: Ramon Quesada<br>Sub-investigators: Kathy Ortiz, Rafael Machado, Alvaro Montoya, Niberto Moreno, Bernardo Sanabria, Marcus St. John<br>Research Coordinators: Sarah Alegre, Maria Ardid, Susan Arp, Poliana Ayala, Ivette Cruz, Kimberly Dizon, Claudia Hodgson, Pearlie Kelly, Sylvia Morales Olivares                                                                                                                                             |
| Baylor Heart & Vascular Hospital<br>Dallas, TX                                                       | Principal Investigators: Robert Stoler<br>Co-Principal Investigator: Robert Hebler<br>Sub-investigators: Paul Grayburn, Carl Henry, Ravi Vallabhan<br>Research Coordinators: Janet Dunkerley, Geoffery Gong, Dion Graybeal, Emily Laible, Vivi St. John, Leslie Willcott                                                                                                                                                                                                    |
| Beth Israel Deaconess Medical Center, Boston MA                                                      | Principal Investigators: Donald Cutlip<br>Sub-investigators: James Chang, Kamal Khabbaz, Sandeep Kumar, Roger Laham, Vasileios-Arsenios Lioutas, David Liu, Warren Manning, Senthil Nathan, Duane Pinto, David Searls, Magdy Selim<br>Research Coordinators: Michael Chen, Kimberly Guibone, Felicity Heath, Jenifer Kaufman, Sarah Kennedy, Susan Papazian, Trishna Sadhwani, Nanditha Shivaprakash, Vinessa Tjoa, Patricia Tyler                                          |
| Cardiac & Vascular Research Center of Northern Michigan – Northern Michigan Hospital<br>Petoskey, MI | Principal Investigators: Louis Cannon<br>Sub-investigators: Chris Akins, David Corteville, Miranda Dalton, Thomas Earl, Jason Ricci, John Talbott<br>Research Coordinators: Jane Fisher, Jennifer LaLonde, Joan Morey, Cindy Witucki                                                                                                                                                                                                                                        |
| Cedars - Sinai Medical Center<br>Los Angeles CA                                                      | Principal Investigators: Raj Makkar<br>Co-Principal Investigator: Wen Cheng<br>Sub-investigators: Hasanian Al-Jilaihawi, Saibal Kar, Mamoo Nakamura<br>Research Coordinators: Zev Allison, David Anderson, Hormoz Babaei, Mitch Gheorghiu, Babak Hariri, Sharjeel Israr, Geeteshwar Mangat, George Matar, Kashif Mohammad, Emil Pais, Jigarkumar Patel, Tejas Rami, Jaideep Sandhu, Nisha Shah, Ripandeep Tiwana, Isil Uzun, Cynthia Valencia, Jonathan Winnick, Paya Zadeh |
| Centre Hôpital Universitaire Ranguel<br>Toulouse, France                                             | Principal Investigators: Didier Carrie<br>Co-Principal Investigator: Bertrand Marcheix<br>Sub-investigators: Frederic Bouisset, Thibault Lhermusier<br>Research Coordinators: Adeline Hupe, Ludovic Lacassagne                                                                                                                                                                                                                                                              |
| Cleveland Clinic Foundation<br>Cleveland, OH                                                         | Principal Investigators: Samir Kapadia<br>Sub-investigators: Amar Krishnaswamy, Mei Lu, Stephanie Mick, Jose Navia, Eric Roselli, Lars Svensson, E. Murat Tuzcu<br>Research Coordinators: Laurie Boehk, Mary Dettmer, Carrie Melgaard, Adrienne Nadvornik, Veronica Peck, Andrea Rohr, Christine Shin, Lydia Sweeney                                                                                                                                                        |
| Clinique Pasteur                                                                                     | Principal Investigators: Didier Tchetché                                                                                                                                                                                                                                                                                                                                                                                                                                    |

| <b>eTable 1. REPRISE III Investigators and Study Support by Site Name</b>                                              |                                                                                                                                                                                                                                                                                                                                                                                                                                                                                                                              |
|------------------------------------------------------------------------------------------------------------------------|------------------------------------------------------------------------------------------------------------------------------------------------------------------------------------------------------------------------------------------------------------------------------------------------------------------------------------------------------------------------------------------------------------------------------------------------------------------------------------------------------------------------------|
| <b>Site</b>                                                                                                            | <b>Study Team</b>                                                                                                                                                                                                                                                                                                                                                                                                                                                                                                            |
| Toulouse, France                                                                                                       | Sub-investigators: Nicolas Dumonteil, Bruno Farah<br>Research Coordinators: Brigitte Jacob, Frederic Petit                                                                                                                                                                                                                                                                                                                                                                                                                   |
| Columbia University Medical Center<br>New York, NY                                                                     | Principal Investigators: Tamim Nazif<br>Sub-investigators: Isaac George, Rebecca Hahn, Omar Khalique, Susheel Kodali, Martin Leon, Torsten Vahl<br>Research Coordinators: Sarah Borden, Marian Hawkey, Rosa Lazarte, Cynthia Martinez, Marina Mathews, Dawn Scotto                                                                                                                                                                                                                                                           |
| Delray Medical Center<br>Delray Beach, FL                                                                              | Principal Investigators: Brian Bethea<br>Co-Principal Investigator: Brijeshwar Maini<br>Research Coordinators: Pamela Beck, Christine Da Costa, Laura Hudson, Joanne Krasnoff, Ricardo Thompson, Wanda Trabal                                                                                                                                                                                                                                                                                                                |
| Duke University Medical Center<br>Durham, NC                                                                           | Principal Investigators: John Harrison<br>Co-Principal Investigator: G. Chad Hughes<br>Sub-investigators: Jeffrey Gaca, Todd Kiefer, Andres Maldonado, Andrew Wang<br>Research Coordinators: Megan Arthur, Caroline Bishop, Krista Camuglia, Edana Christy, Megan Eure, Dana Henderson, Sara Michael, Stephanie Newbold, Cynthia Pierce, Dana Schrantz, Alexis Sharp, Leanne Stanton                                                                                                                                         |
| Emory University Hospital,<br>Emory University Hospital<br>Midtown, Emory St.<br>Joseph's<br>Atlanta, GA               | Principal Investigators: Vinod Thourani (now at MedStar, Washington DC); Robert Guyton<br>Sub-investigators: Vasilis Babaliaros, Chandan Devireddy, Stamatios Lerakis, Bradley Leshnowar, James Stewart, Eric Sarin<br>Research Coordinators: Kim Baio, Elizabeth Charles, Renee Cook, Atira Goodwin, Maria Kaner, Patricia Keegan, Madeline Kohrumel, Kimberly McWhorter, Mary Mungai, Alexis Neill, Maryellen Nelms, Leslie Ogburn, Himaben Patel, Kristy Pitts, Michael Quinn, Heather Sigler, Amy Simone, Lauren Wheeler |
| Erasmus MC - University Medical Center Rotterdam<br>Rotterdam, Netherlands                                             | Principal Investigators: Nicolas van Mieghem<br>Sub-investigators: Joost Daemen, Peter de Jaegere, Nahid El Faquir, Marcel Geleijnse, A.Pieter Kappetein, Herbert Kroon, Zouhair Rahhab, Ramon Rodriguez-Olivares, Lennart Van Gils<br>Research Coordinators: Elisabeth Huijskens, Arno Ruiten, Nico Van den Berg                                                                                                                                                                                                            |
| Evanston Hospital<br>Evanston, IL                                                                                      | Principal Investigators: Ted Feldman<br>Sub-investigators: Mayra Guerrero, Justin Levisay, Paul Pearson, Hyde Russell, Michael Salinger<br>Research Coordinators: Craig Konwinski, Dale Seifert, Jean Skelskey, Lisa Smalley, Frances Uy                                                                                                                                                                                                                                                                                     |
| Herzzentrum Universität Leipzig<br>Leipzig, Germany                                                                    | Principal Investigators: Axel Linke<br>Sub-investigators: Stephan Haussig, Robert Hoellriegel, David Holzhey, Philipp Kiefer, Sergey Leontyev, Norman Mangner, Dominik Michalski, Anne katrin Mueller, Katrin Pomrehn, Maximilian Roeder, Beate Rott, Marcus Sandri, Florian Schlotter, Gerhard Schuler, Georg Stachel, Anika Stockert, Gesa Weise, Ephraim Winzer, Felix Woitek, Marion Zimmer<br>Research Coordinators: Jennifer Adam, Jacqueline Foehlich, Mandy Ludwig                                                   |
| Hospital of the University of Pennsylvania, Presbyterian University of Pennsylvania Medical Center<br>Philadelphia, PA | Principal Investigators: Howard Herrmann<br>Co-Principal Investigator: Saif Anwaruddin, Wilson Szeto<br>Sub-investigators: Joseph Bavaria, Nimesh Desai, Jay Giri, Prashanth Vallabhajosyula<br>Research Coordinators: Delonjo Barber, Rachel Callahan, Zach Fox, Ashley Hoedt, Marisa Konig, Matt Kramer, Grace Lacorte, Krimi Patel, Laura Schuck, Mary Siki, Madeleine Walsh                                                                                                                                              |
| Kaleida Health<br>Buffalo, NY                                                                                          | Principal Investigators: Vijay Iyer<br>Co-Principal Investigator: Gary Grosner<br>Sub-investigators: Hashmet Ashraf, Eileen Daetsch, Stanley Fernandez, Saurabh                                                                                                                                                                                                                                                                                                                                                              |

| <b>eTable 1. REPRISE III Investigators and Study Support by Site Name</b>            |                                                                                                                                                                                                                                                                                                                                                                                                                                                                                                  |
|--------------------------------------------------------------------------------------|--------------------------------------------------------------------------------------------------------------------------------------------------------------------------------------------------------------------------------------------------------------------------------------------------------------------------------------------------------------------------------------------------------------------------------------------------------------------------------------------------|
| <b>Site</b>                                                                          | <b>Study Team</b>                                                                                                                                                                                                                                                                                                                                                                                                                                                                                |
|                                                                                      | Malhotra, William Morris, Kishor Phadke, David Zlotnick<br>Research Coordinators: Courtney Bishop, Robin Stein, Adeline Thurston                                                                                                                                                                                                                                                                                                                                                                 |
| Lindner Center for Research and Education at Christ Hospital<br>Cincinnati, OH       | Principal Investigators: Dean Kereiakes<br>Sub-investigators: Geoffrey Answini, Amit Arora, Mario Castillo-Sang, Joseph Choo, Ian Sarembock<br>Research Coordinators: Kathleen Buszek, Megan Francis, Janet Fricker, Ann Friedmann, Deborah Garza, Karen Ibanez, Laura Joy, Christine Lawrence, Tessa Messinger, Linda Pennington, Roxanne Robertson, Darlene Rock, Jane Schwartz, Terri Sikora, Ngoc Tran, David White, Julie Williams                                                          |
| Mayo Clinic Foundation<br>Rochester, MN                                              | Principal Investigators: Gurpreet Sandhu<br>Sub-investigators: Kevin Greason, Rajiv Gulati, Alberto Pochettino<br>Research Coordinators: Desirae Howe-Clayton, Ramona Johnson, Pamela Mundt, Jackie Reiter                                                                                                                                                                                                                                                                                       |
| McGill University Health Centre<br>Montreal, QC, Canada                              | Principal Investigators: Nicolo Piazza<br>Sub-investigators: Jean Buithieu, Benoit De Varennes, Liam Durcan, Kevin Lachapelle, Giuseppe Martucci, Marco Spaziano<br>Research Coordinators: Zuyi Jiang                                                                                                                                                                                                                                                                                            |
| Medical City Dallas Hospital<br>Dallas, TX                                           | Principal Investigators: Todd Dewey<br>Co-Principal Investigator: Bruce Bowers<br>Sub-investigators: Ambarish Gopal<br>Research Coordinators: Lynn Blair-Anton, Mona Hedra, Brandon Prince, Gina Remington                                                                                                                                                                                                                                                                                       |
| Methodist DeBakey Heart Center, Methodist Hospital Research Institute<br>Houston, TX | Principal Investigators: Neal Kleiman<br>Co-Principal Investigator: Michael Reardon<br>Sub-investigators: Colin Barker, Gerald Lawrie, Chun Lin, Stephen Little, Mahesh Ramchandani, Basel Ramlawi, Manuel Reyes, Scott Scheinin, Karanbir Singh<br>Research Coordinators: Jeannie Arredondo, Patricia Brinegar, Laura Canter, Lisa Green, LaShawna Green, Meagan Griffith, Pamela Hazen, Chizoba Ifeorah, Chioma Ikoku, Amber Jacobs, Mary Mata, Tammara Moore, Wesley Oglesby, Carol Underwood |
| Methodist Heart Hospital/South Texas Methodist Hospital<br>San Antonio, TX           | Principal Investigators: Jorge Alvarez<br>Sub-investigators: Daniel Donovan, James Garrison<br>Research Coordinators: Gloria Carreon, Johnie Piper, Sherri Shade                                                                                                                                                                                                                                                                                                                                 |
| Monash Medical Centre<br>Clayton, Australia                                          | Principal Investigators: Robert Gooley<br>Sub-investigators: Adam Brown, David Di Fiore, Abdul Ihdahid, Siobhan Lockwood, Liam McCormick, Sarah Zaman<br>Research Coordinators: MaryAnne Austin, Brianna Davidson, Adele Manzoney, Wendy Wallace-Mitchell                                                                                                                                                                                                                                        |
| Morristown Memorial Hospital<br>Morristown, NJ                                       | Principal Investigators: Barry Cohen<br>Sub-investigators: John Brown, Robert Kipperman, Konstantinos Koulogiannis, Christopher Magovern, Leo Marcoff, Marek Polomsky, James Slater, Steve Xydas<br>Research Coordinators: Diane Agar, Autumn Benner, Christine Ciprich, Mary DiNapoli, Elena Lobur, Lucille Polise, Susan Sentman                                                                                                                                                               |
| Morton Plant Mease Healthcare System<br>Clearwater, FL                               | Principal Investigators: Joshua Rovin<br>Co-Principal Investigator: Douglas Spriggs<br>Sub-investigators: Michael Barry, Todd Kovach, Lang Lin, Jorge Navas, John Ofenloch, Vijay Patel<br>Research Coordinators: Laura Blanchard, Donna Bulmer, Sue Fisher, Delia Johnson, Teresa Jones, Susie Montgomery                                                                                                                                                                                       |
| NC Heart and Vascular Research, Rex Hospital                                         | Principal Investigators: Robert Jobe<br>Sub-investigators: Curtis Anderson, Christian Gring, James Jollis, Lance Landvater,                                                                                                                                                                                                                                                                                                                                                                      |



| <b>eTable 1. REPRISE III Investigators and Study Support by Site Name</b>                |                                                                                                                                                                                                                                                                                                                                                                                                                                                      |
|------------------------------------------------------------------------------------------|------------------------------------------------------------------------------------------------------------------------------------------------------------------------------------------------------------------------------------------------------------------------------------------------------------------------------------------------------------------------------------------------------------------------------------------------------|
| <b>Site</b>                                                                              | <b>Study Team</b>                                                                                                                                                                                                                                                                                                                                                                                                                                    |
| Raleigh, NC                                                                              | Willis Wu, James Zidar<br>Research Coordinators: Heather Dionne, Jamal Moss, Nicole Trader                                                                                                                                                                                                                                                                                                                                                           |
| North Shore University Hospital (Manhasset) Manhasset, NY                                | Principal Investigators: Bruce Rutkin<br>Sub-investigators: Sonia Henry, Rajiv Jauhar, Robert Palazzo, Jacob Scheinerman, Bart Steinberg<br>Research Coordinators: Christina Brennan, Diane Delliliune, Natasha Phrsai, Vadewattie Seeratan                                                                                                                                                                                                          |
| OhioHealth Research and Innovation Institute - Riverside Methodist Hospital Columbus, OH | Principal Investigators: Steven Yakubov<br>Sub-investigators: Arash Arshi, Geoffrey Blossom, Steven Duff, Nathan Kander, Jefferson Lyons, Carlos Sanchez, Daniel Watson<br>Research Coordinators: Christina Belcher, Rose Fischer, Vickie Hatch, Kitra Hunter, Katy Monnin, Lori Popelas, Martha Slyman, Carolann Strausbaugh                                                                                                                        |
| Ohio State University Medical Center Columbus, OH                                        | Principal Investigators: Scott Lilly<br>Sub-investigators: Konstantinos Boudoulas, Juan Crestanello, Barry George, Danielle Jones, Ahmet Kilic, Scott Lilly, David Orsinelli, John Sirak, Bryan Whitson<br>Research Coordinators: Denise Fadorsen, Hallie Hank, Annie Kellum, Roderick Liptrot                                                                                                                                                       |
| Piedmont Hospital Atlanta, GA                                                            | Principal Investigators: Vivek Rajagopal<br>Co-Principal Investigator: James Kauten<br>Sub-investigators: W. Morris Brown, David Dean, John Gott, Christopher Meduri, Federico Milla<br>Research Coordinators: Elisa Amoroso, Nita Cadic, Kashaine Gray, Shelley Holt                                                                                                                                                                                |
| Providence St. Vincent Medical Center Portland, OR                                       | Principal Investigators: Robert Hodson<br>Sub-investigators: Eric Kirker, Jeffrey Swanson, Gary Ott, Geoffrey Wilson, Ethan Korngold<br>Research Coordinators: Ellen Muir, Heather Aiona, Sarah Grant, Angela Redd, Gretchen Sminkey                                                                                                                                                                                                                 |
| Scottsdale Healthcare – Shea Scottsdale, AZ                                              | Principal Investigators: David Rizik<br>Sub-investigators: Robert Burke, Bimal Padaliya, Robert Riley, Maulik Shah, Alok Sharma<br>Research Coordinators: Lindsay Arth, Amy Boylan, Donna Duerr, Joanne Saczynski, Regina Valenzuela, Patricia Williams                                                                                                                                                                                              |
| Scripps Clinic La Jolla, CA                                                              | Principal Investigators: Paul Teirstein<br>Sub-investigators: Scot Brewster, Curtiss Stinis, J. Jeffrey Tyner<br>Research Coordinators: Tiffany Buchanan, Chelsea Butler, Sarah Clarke, Harleen Dhaliwal, Matthew Hollen, Ann Jensen, Jennifer Lutes, Kathleen Rees, Andrew Roberts, Pamela Staggs, Connor Wayman                                                                                                                                    |
| St. John's Hospital Springfield, IL                                                      | Principal Investigators: Gregory Mishkel<br>Co-Principal Investigator: William Stevens<br>Sub-investigators: Jennifer Nicholson, Raja Gopaldas, Jeffrey Christy, Robert Woodruff, Nilesh Goswami, Jeffrey Goldstein, John Gill, Charlene Shallow, Vincent Zuck, Roberto Pacheco, Shailesh Nandish, Nasar Nallamothu<br>Research Coordinators: Lauren McNeil, Amy Woolfolk, Lauren Bainter, Janelle Megginson, Christine Shugart, Michelle Williamson |
| St. Vincent's Hospital                                                                   | Principal Investigators: James Hermiller<br>Co-Principal Investigator: David Heimansohn, Sina Moainie<br>Sub-investigators: Gregory Elsner, Douglas Segar, Andrew Sampson, Scott Hanan, Peter Walts, Frank Green, Christopher Salerno, Michael Ball<br>Research Coordinators: Rachel Johnson, Patrice Powell, Barbara Kingma                                                                                                                         |
| Stanford University Medical Center                                                       | Principal Investigators: Alan Yeung<br>Co-Principal Investigator: Michael Fischbein                                                                                                                                                                                                                                                                                                                                                                  |

| <b>eTable 1. REPRISE III Investigators and Study Support by Site Name</b>              |                                                                                                                                                                                                                                                                                                                                                                          |
|----------------------------------------------------------------------------------------|--------------------------------------------------------------------------------------------------------------------------------------------------------------------------------------------------------------------------------------------------------------------------------------------------------------------------------------------------------------------------|
| <b>Site</b>                                                                            | <b>Study Team</b>                                                                                                                                                                                                                                                                                                                                                        |
|                                                                                        | Sub-investigators: D. Craig Miller, William Fearon<br>Research Coordinators: Cheryl McWard, Leigh Trautman, Zoe Magee, Martina Speight, Danna Salcaleon-Cua, Sandra Cardoza, Mykl Morrissey                                                                                                                                                                              |
| Swedish Medical Center<br>Seattle, WA                                                  | Principal Investigators: Robert Hodson<br>Sub-investigators: Eric Kirker, Ethan Korngold, Gary Ott, Jeffrey Swanson, Geoffrey Wilson<br>Research Coordinators: Heather Aiona, Sarah Grant, Ellen Muir, Angela Redd                                                                                                                                                       |
| The Prince Charles Hospital<br>Chermside, Australia                                    | Principal Investigators: Darren Walters<br>Sub-investigators: Julian Chan, Niranjan Gaikwad, Ryan Markham, Dale Murdoch, Karl Poon, Anthony Putrino, Owen Raffel<br>Research Coordinators: Tracy McCulloch, Sandy Phillips, Maria Pietsch, Maricel Roxas, Suzanne Spencer, Chantal Tabrett                                                                               |
| UC Davis Medical Center                                                                | Principal Investigators: Jeffrey Southard<br>Sub-investigators: Thomas Smith, Reginald Low, Garrett Wong, Jason Rogers, Walter Boyd<br>Research Coordinators: Kimberley Book, Kori Harder, Teresa Facchini, Codi Cole, Lisa Ayer-Rand                                                                                                                                    |
| Union Memorial Hospital                                                                | Principal Investigators: John Wang<br>Sub-investigators: Amish Sura, Michael Fiocco, Antony Kaliyadan, Nauman Siddiqi, Dipin Gupta, Momina Mastoor, Luis Dibos<br>Research Coordinators: Mary Park, Judith Raqueno, Sandeep Kumar, Rachel Campbell                                                                                                                       |
| Universitaetsklinik<br>Eppendorf, Universitares<br>Herzzentrum UKE<br>Hamburg, Germany | Principal Investigators: Mahir Karakas, Ulrich Schaefer<br>Sub-investigators: Lenard Conradi, Florian Deuschl, Sarina Schaefer, Moritz Seiffert, Karsten Sydow, Gotz Thomalla, Eike Tigges<br>Research Coordinators: Arthur Behnke, Janine Nebel, Dagmar Ott, Marion Redlfsen, Diana Sprechert                                                                           |
| University of Kansas<br>Hospital<br>Kansas City, KS                                    | Principal Investigators: George Zorn<br>Co-Principal Investigator: Peter Tadros<br>Sub-investigators: Greg Muehlebach, Mark Wiley<br>Research Coordinators: Jenny Bush, Alyssa Boyce, Donita Atkins, Tilitha Shawgo, Susie Page                                                                                                                                          |
| University of Miami<br>Hospital<br>Miami FL                                            | Principal Investigators: Mauricio Cohen<br>Sub-investigators: Carlos Alfonso, Martin Blisker, Roger Carrillo, Eduardo de Marchena, Claudia Martinez, Donald Williams<br>Research Coordinators: Carmen Baez-Garcia, Bonni Lang                                                                                                                                            |
| University of Michigan<br>Hospitals<br>Ann Arbor, MI                                   | Principal Investigators: Michael Deeb<br>Sub-investigators: David Bach, Nicole Bhave, Stanley Chetcuti, Paul Grossman, Troy LaBounty, Daniel Menees, Himanshu Patel, Richard Prager, Matthew Romano<br>Research Coordinators: Lauren Conlin, Rachel Geml, Jessica Oakley<br>Kimberly Redburn, Sarah Rubin                                                                |
| University of Minnesota<br>Medical Center<br>Minneapolis, MN                           | Principal Investigators: Gregory Helmer<br>Sub-investigators: Bilal Ali, Timinder Biring, Mustapha Ezzeddine, Ranjit John, Kenneth Liao, Emil Missov, Ganesh Raveendran, Uma Valeti, Demitris Yannopoulos, Alexander Zubkov<br>Research Coordinators: Mary Baker, Barbara Bruhn-Ding, Emily Caldwell, Cassandra Malchow, Gretchen Peichel, Margaret Peterson, Deb Wilder |
| University of Pittsburgh<br>Medical Center                                             | Principal Investigators: Thomas Gleason<br>Sub-investigators: Joon Lee, Ibrahim Sultan, Dustin Kliner, Matthew Harinstein, Elizabeth Christensen, Forozaan Navid, William Katz, Frederick Crock, Joao Cavalcante, Dhaval Trivedi, John Schindler<br>Research Coordinators: Rachel McGargle, Laurie Dennis, Elizabeth Younkin,                                            |

| <b>eTable 1. REPRISE III Investigators and Study Support by Site Name</b> |                                                                                                                                                                                                                                                                                                                                                                                          |
|---------------------------------------------------------------------------|------------------------------------------------------------------------------------------------------------------------------------------------------------------------------------------------------------------------------------------------------------------------------------------------------------------------------------------------------------------------------------------|
| <b>Site</b>                                                               | <b>Study Team</b>                                                                                                                                                                                                                                                                                                                                                                        |
|                                                                           | Chrissy Butler, Kristin Valchar, Melissa Enlow, Mary Kunkel                                                                                                                                                                                                                                                                                                                              |
| University of Washington Medical Center                                   | Principal Investigators: Creighton Don<br>Sub-investigators: James McCabe, Jason Smith, Mark Reisman, Larry Dean, Gabriel Aldea<br>Research Coordinators: Kate Jordan, Devin Baerenwald, Fatemeh Ranjbara, Angela LeClair, Rebecca Letterer, Emily Anderson                                                                                                                              |
| Veterans Administration Palo Alto Medical Center Palo Alto, CA            | Principal Investigators: John Giacomini<br>Co-Principal Investigator: Thomas Burdon<br>Sub-investigators: Maurice Buchbinder, James Fann, Robert Mitchell, Research Coordinators: Judy Baer, Grace Liang, Son Nguyen, Theresa Peters                                                                                                                                                     |
| Wake Forest University School of Medicine Winston-Salem, NC               | Principal Investigators: David Zhao<br>Co-Principal Investigator: Neal Kon<br>Sub-investigators: Robert Applegate, Sanjay Gandhi, Edward Kincaid, Research Coordinators: Sharon McDaniel, Amanda Morgan, Wendi White, Travis Young                                                                                                                                                       |
| Washington Hospital Center Washington, DC                                 | Principal Investigators: Ron Waksman<br>Co-Principal Investigator: Paul Corso<br>Sub-investigators: Itsik Ben-Dor, August Pichard, Lowell Satler, Christian Shults<br>Research Coordinators: M. Chadi Alraies, Elizabeth Bond, Kyle Buchanan, Tina Daovd, Michelle Deville, Sandra Griffin, Prerna Malla, Petros Okubagzi, Farhanaz Panjshiri, Toby Rogers, Arie Steinvil, Donna Whitman |
| Washington University School of Medicine St. Louis, MO                    | Principal Investigators: John Lasala<br>Co-Principal Investigator: Hersh Maniar<br>Sub-investigators: Brian Lindman, Spencer Melby, Nishath Quader, Alan Zajarias<br>Research Coordinators: Kelly Koogler, Michelle Myers, Sam Neudecker                                                                                                                                                 |
| William Beaumont Hospital Royal Oak, MI                                   | Principal Investigators: George Hanzel<br>Sub-investigators: Amr Abbas, Abhay Bilolikar, Michael Gallagher, Ivan Hanson, Nathan Kerner, Robert Safian, Marc Sakwa, Francis Shannon<br>Research Coordinators: Diedre Brunk, Ann McHugh, Pat O'Bryan, Katherine Wood                                                                                                                       |

| <b>eTable 2. REPRISE III Data Monitoring Committee, Case Review Committee, Steering Committee, and Core Laboratories</b>                                                                                                                                                        |                                                                                                                                   |
|---------------------------------------------------------------------------------------------------------------------------------------------------------------------------------------------------------------------------------------------------------------------------------|-----------------------------------------------------------------------------------------------------------------------------------|
| <b>Data Monitoring Committee Members</b>                                                                                                                                                                                                                                        |                                                                                                                                   |
| <b>Name</b>                                                                                                                                                                                                                                                                     | <b>Institution</b>                                                                                                                |
| Stuart Pocock, PhD<br>DMC Chair                                                                                                                                                                                                                                                 | Department of Medical Statistics<br>London School of Hygiene & Tropical Medicine                                                  |
| David P. Faxon, MD<br>DMC Member                                                                                                                                                                                                                                                | Brigham & Women's Hospital<br>Cardiovascular Division                                                                             |
| Bernard Gersh, MB, ChB, DPhil<br>DMC Member                                                                                                                                                                                                                                     | Mayo Clinic<br>Division of Cardiovascular Diseases                                                                                |
| Steven Livesey, MD<br>DMC Member                                                                                                                                                                                                                                                | Department of Cardiothoracic Surgery<br>Southampton General Hospital                                                              |
| <i>Independent Study Statisticians (non-voting)</i>                                                                                                                                                                                                                             |                                                                                                                                   |
| Timothy Collier, MSc                                                                                                                                                                                                                                                            | Department of Medical Statistics                                                                                                  |
| John Gregson, PhD                                                                                                                                                                                                                                                               | London School of Hygiene & Tropical Medicine                                                                                      |
| <b>Core Laboratories</b>                                                                                                                                                                                                                                                        |                                                                                                                                   |
| <b>Type</b>                                                                                                                                                                                                                                                                     | <b>Institution</b>                                                                                                                |
| Angiography<br>& CT/X-ray                                                                                                                                                                                                                                                       | Jeffrey J. Popma, MD (Director)<br>Harvard Medical Faculty Physicians at Beth Israel Deaconess<br>Medical Center, Boston, MA, USA |
| Echocardiography                                                                                                                                                                                                                                                                | Neil J. Weissman, MD (Director)<br>MedStar Health Research Institute, Washington, DC, USA                                         |
| Electrocardiography                                                                                                                                                                                                                                                             | Peter J. Zimetbaum, MD (Director)<br>Harvard Clinical Research Institute, Boston, MA, USA                                         |
| Pathology                                                                                                                                                                                                                                                                       | Renu Virmani, MD (Director)<br>CV Path Institute, Inc., Gaithersburg, MD, USA                                                     |
| <b>Clinical Events Committee (Baim Institute for Clinical Research)</b>                                                                                                                                                                                                         |                                                                                                                                   |
| <b>Name</b>                                                                                                                                                                                                                                                                     | <b>Institution</b>                                                                                                                |
| Sergio Waxman, MD (IC, Chair)                                                                                                                                                                                                                                                   | Lahey Clinic, Burlington, MA, USA                                                                                                 |
| Carey Kimmelstiel, MD (IC)                                                                                                                                                                                                                                                      | Tufts New England Medical Center, Boston, MA, USA                                                                                 |
| Gregory Smaroff, MD (CT Surg)                                                                                                                                                                                                                                                   | Lahey Clinic, Burlington, MA, USA                                                                                                 |
| Roberto Rodriguez, MD (CT Surg)                                                                                                                                                                                                                                                 | Lankenau Hospital, Wynnewood, PA, USA                                                                                             |
| Viken Babikian, MD (Neurologist)                                                                                                                                                                                                                                                | Boston Medical Center, Boston, MA, USA                                                                                            |
| <b>Case Review Committee</b>                                                                                                                                                                                                                                                    |                                                                                                                                   |
| <ul style="list-style-type: none"> <li>was responsible for the review of patient screening data to confirm eligibility given the increased surgical risk of the patient population being studied and to ensure consistency of patients enrolled across study centers</li> </ul> |                                                                                                                                   |
| <b>Name</b>                                                                                                                                                                                                                                                                     | <b>Institution</b>                                                                                                                |
| Ted Feldman (CRC Co-Chairmen)                                                                                                                                                                                                                                                   | Evanston Hospital Cardiology Division, Evanston, IL                                                                               |
| Michael Reardon (CRC Co-Chairmen)                                                                                                                                                                                                                                               | Houston Methodist DeBaakey Heart and Vascular Center, Houston, TX, USA                                                            |
| Dan Blackman                                                                                                                                                                                                                                                                    | Department of Cardiology, Leeds General Infirmary, Leeds, UK                                                                      |
| Colin Barker                                                                                                                                                                                                                                                                    | Methodist DeBaakey Heart & Vascular Center, Houston, TX                                                                           |
| Henrik Bjursten                                                                                                                                                                                                                                                                 | Department of Cardiology, Skåne University Hospital, Lund, Sweden                                                                 |
| Nicolas Dumonteil                                                                                                                                                                                                                                                               | Clinique Pasteur, Toulouse, France                                                                                                |
| Thomas Gleason                                                                                                                                                                                                                                                                  | University of Pittsburgh Medical Center, Pittsburgh PA                                                                            |
| Matthias Götberg                                                                                                                                                                                                                                                                | Department of Cardiology, Clinical Sciences, Lund University,                                                                     |

| <b>eTable 2. REPRISE III Data Monitoring Committee, Case Review Committee, Steering Committee, and Core Laboratories</b> |                                                                                                          |
|--------------------------------------------------------------------------------------------------------------------------|----------------------------------------------------------------------------------------------------------|
|                                                                                                                          | Skane University Hospital, Lund, Sweden                                                                  |
| David Hildick-Smith                                                                                                      | Sussex Cardiac Centre, Brighton and Sussex University Hospitals, UK                                      |
| Chris Meduri                                                                                                             | Piedmont Hospital, Atlanta GA                                                                            |
| A. Pieter Kappetein                                                                                                      | Erasmus MC - University Medical Center Rotterdam Rotterdam, Netherlands                                  |
| Paul Pearson                                                                                                             | Evanston Hospital Cardiology Division, Evanston, IL                                                      |
| Vivek Rajagopal                                                                                                          | Piedmont Hospital, Atlanta GA                                                                            |
| David Rizik                                                                                                              | HonorHealth and the Scottsdale-Lincoln Health Network, Scottsdale, AZ                                    |
| Mike Salinger                                                                                                            | Evanston Hospital Cardiology Division, Evanston, IL                                                      |
| Mark Spence                                                                                                              | NHS, Belfast, United Kingdom                                                                             |
| Didier Tchétché                                                                                                          | Clinique Pasteur, Toulouse, France                                                                       |
| Uday Trivedi                                                                                                             | Royal Sussex County Hospital, Brighton, UK                                                               |
| Dominic Allocco (Sponsor Representative)                                                                                 | Boston Scientific, Marlborough, MA                                                                       |
| Paul Underwood (Sponsor Representative)                                                                                  | Boston Scientific, Marlborough, MA                                                                       |
| <b>REPRISE III Steering Committee</b>                                                                                    |                                                                                                          |
| <b>Name</b>                                                                                                              | <b>Institution</b>                                                                                       |
| Ted Feldman (co-PI)                                                                                                      | Evanston Hospital Cardiology Division, Evanston, IL                                                      |
| Michael Reardon (co-PI)                                                                                                  | Houston Methodist DeBakey Heart and Vascular Center, Houston, TX, USA                                    |
| Joseph Bavaria                                                                                                           | Hospital of the University of Pennsylvania, Philadelphia, PA                                             |
| Maurice Buchbinder                                                                                                       | Foundation for cardiovascular medicine, Professor of clinical medicine, Stanford university, Stanford CA |
| Anson Cheung                                                                                                             | St Paul's Hospital - University of British Columbia, Vancouver, BC                                       |
| Michael Deeb                                                                                                             | University of Michigan Hospitals, Ann Arbor, MI                                                          |
| Todd Dewey                                                                                                               | HCA Medical City Dallas Hospital, Dallas                                                                 |
| Eberhard Grube                                                                                                           | Elisabeth-Krankenhaus Hospital, Essen, Germany                                                           |
| Alan Heldman                                                                                                             | University of Miami Miller School of Medicine, Miami, FL,                                                |
| Samir Kapadia                                                                                                            | Cleveland Clinic, Cleveland, OH                                                                          |
| A. Pieter Kappetein                                                                                                      | Erasmus MC - University Medical Center Rotterdam Rotterdam, Netherlands                                  |
| Martin Leon                                                                                                              | Columbia University Medical Center, Cardiovascular Research Foundation, New York City, NY                |
| Ian Meredith                                                                                                             | Boston Scientific, Marlborough, MA                                                                       |
| Vinod Thourani                                                                                                           | Emory University Hospital, Atlanta GA                                                                    |

**eTable 3. REPRISE III Inclusion Criteria**

- IC1. Patient has documented calcific, severe native aortic stenosis with an initial AVA of  $\leq 1.0 \text{ cm}^2$  (or AVA index of  $\leq 0.6 \text{ cm}^2/\text{m}^2$ ) and a mean pressure gradient  $\geq 40 \text{ mm Hg}$  or jet velocity  $\geq 4.0 \text{ m/s}$ , as measured by echocardiography and/or invasive hemodynamics.
- IC2. Patient has a documented aortic annulus size of  $\geq 20 \text{ mm}$  and  $\leq 27 \text{ mm}$  based on the center's assessment of pre-procedure diagnostic imaging (and confirmed by the CRC) and, for the randomized cohort, is deemed treatable with an available size of both test and control device.
- IC3. Patient has symptomatic aortic valve stenosis with NYHA Functional Class  $\geq \text{II}$
- IC4. There is agreement by the heart team (which must include a site investigator interventionalist and a site investigator cardiac surgeon) that patient is at high or extreme operative risk for surgical valve replacement (see **Note 1** below for definitions of extreme and high risk, the required level of surgical assessment, and CRC confirmation) and that TAVR is appropriate. Additionally, patient has at least one of the following.
- Society of Thoracic Surgeons score  $\geq 8\%$  -OR-
  - If STS  $< 8$ , patient has at least one of the following conditions:
    - Hostile chest
    - Porcelain aorta
    - Severe pulmonary hypertension ( $> 60 \text{ mmHg}$ )
    - Prior chest radiation therapy
    - Coronary artery bypass graft(s) at risk with re-operation
    - Severe lung disease (need for supplemental oxygen,  $\text{FEV}_1 < 50\%$  of predicted,  $\text{DLCO} < 60\%$ , other evidence of major pulmonary dysfunction)
    - Neuromuscular disease that creates risk for mechanical ventilation or rehabilitation after surgical aortic valve replacement
    - Orthopedic disease that creates risk for rehabilitation after surgical aortic valve replacement
    - Childs Class A or B liver disease (patients with Childs Class C disease are not eligible for inclusion in this trial)
    - Frailty as indicated by at least one of the following: 5-meter walk  $> 6$  seconds, Activities of Daily Living Score of 3/6 or less, body mass index  $< 21$ , wheelchair bound, unable to live independently
      - Age  $\geq 90$  years
      - Other evidence that patient is at high or extreme risk for surgical valve replacement (CRC must confirm agreement with site heart team that patient meets high or extreme risk definition)
- IC5. Heart team (which must include a cardiac interventionalist and an experienced cardiac surgeon) assessment that the patient is likely to benefit from valve replacement.
- IC6. Patient (or legal representative) understands the study requirements and the treatment procedures, and provides written informed consent.
- IC7. Patient, family member, and/or legal representative agree(s) and patient is capable of returning to the study hospital for all required scheduled follow up visits.

**Note 1:** Extreme operative risk and high operative risk were defined as shown below. The risk of operative mortality and morbidity was to be assessed via an in-person evaluation by a center cardiac surgeon and was confirmed by the CRC (which included an experienced cardiac surgeon).

**Extreme Operative Risk:** Predicted operative mortality or serious, irreversible morbidity risk  $\geq 50\%$  at 30 days.

**High Operative Risk:** Predicted operative mortality or serious, irreversible morbidity risk  $\geq 15\%$  at 30 days.

Abbreviations: AVA=aortic valve area; CRC=case review committee; DLCO= diffusion capacity of the lung for carbon monoxide; FEV= forced expiratory volume; NYHA=New York Heart Association; TAVR=transcatheter aortic valve replacement

**eTable 4. REPRISE III Exclusion Criteria**

|       |                                                                                                                                                                                                                                                                                         |
|-------|-----------------------------------------------------------------------------------------------------------------------------------------------------------------------------------------------------------------------------------------------------------------------------------------|
| EC1.  | Patient has a congenital unicuspid or bicuspid aortic valve.                                                                                                                                                                                                                            |
| EC2.  | Patient has had an acute myocardial infarction within 30 days prior to the index procedure (defined as Q-wave MI or non-Q-wave MI with total CK elevation $\geq$ twice normal in the presence of CK-MB elevation and/or troponin elevation).                                            |
| EC3.  | Patient has had a cerebrovascular accident or transient ischemic attack within the past 6 months prior to study enrollment.                                                                                                                                                             |
| EC4.  | Patient has end-stage renal disease or has GFR $<20$ (based on Cockcroft-Gault formula).                                                                                                                                                                                                |
| EC5.  | Patient has a pre-existing prosthetic heart aortic or mitral valve.                                                                                                                                                                                                                     |
| EC6.  | Patient has severe (4+) aortic, tricuspid, or mitral regurgitation.                                                                                                                                                                                                                     |
| EC7.  | Patient has a need for emergency surgery for any reason.                                                                                                                                                                                                                                |
| EC8.  | Patient has a history of endocarditis within 6 months of index procedure or evidence of an active systemic infection or sepsis.                                                                                                                                                         |
| EC9.  | Patient has echocardiographic evidence of new intra-cardiac vegetation or intraventricular or paravalvular thrombus requiring intervention.                                                                                                                                             |
| EC10. | Patient has Hgb $<9$ g/dL, platelet count $<50,000$ cells/mm <sup>3</sup> or $>700,000$ cells/mm <sup>3</sup> , or white blood cell count $<1,000$ cells/mm <sup>3</sup> .                                                                                                              |
| EC11. | Patient requires chronic anticoagulation therapy after the implant procedure and cannot be treated with warfarin (other anticoagulants are not permitted in the first month) for at least 1 month concomitant with either aspirin or clopidogrel <sup>a</sup> .                         |
| EC12. | Patient has had a gastrointestinal bleed requiring hospitalization or transfusion within the past 3 months, or has other clinically significant bleeding diathesis or coagulopathy that would preclude treatment with required antiplatelet regimen, or will refuse transfusions.       |
| EC13. | Patient has known hypersensitivity to contrast agents that cannot be adequately pre-medicated, or has known hypersensitivity to aspirin, all P2Y <sub>12</sub> inhibitors, heparin, nickel, tantalum, titanium, or polyurethanes.                                                       |
| EC14. | Patient has a life expectancy of less than 12 months due to non-cardiac, comorbid conditions based on the assessment of the investigator at the time of enrollment.                                                                                                                     |
| EC15. | Patient has hypertrophic obstructive cardiomyopathy.                                                                                                                                                                                                                                    |
| EC16. | Patient has any therapeutic invasive cardiac or vascular procedure within 30 days prior to the index procedure (except for balloon aortic valvuloplasty or pacemaker implantation, which are allowed).                                                                                  |
| EC17. | Patient has untreated coronary artery disease, which in the opinion of the treating physician is clinically significant and requires revascularization.                                                                                                                                 |
| EC18. | Patient has severe left ventricular dysfunction with ejection fraction $<20\%$ .                                                                                                                                                                                                        |
| EC19. | Patient is in cardiogenic shock or has hemodynamic instability requiring inotropic support or mechanical support devices.                                                                                                                                                               |
| EC20. | Patient has severe vascular disease that would preclude safe access (e.g., aneurysm with thrombus that cannot be crossed safely, marked tortuosity, significant narrowing of the abdominal aorta, severe unfolding of the thoracic aorta, or symptomatic carotid or vertebral disease). |
| EC21. | Patient has thick ( $>5$ mm) protruding or ulcerated atheroma in the aortic arch                                                                                                                                                                                                        |
| EC22. | Patient has arterial access that is not acceptable for the test and control device delivery systems as defined                                                                                                                                                                          |

**eTable 4. REPRISE III Exclusion Criteria**

- in the device Instructions For Use.
- EC23. Patient has current problems with substance abuse (e.g., alcohol, etc.).
- EC24. Patient is participating in another investigational drug or device study that has not reached its primary endpoint.
- EC25. Patient has untreated conduction system disorder (e.g., Type II second degree atrioventricular block) that in the opinion of the treating physician is clinically significant and requires a pacemaker implantation. Enrollment is permissible after permanent pacemaker implantation.
- EC26. Patient has severe incapacitating dementia.

a: An alternative P2Y<sub>12</sub> inhibitor may be prescribed if patient is allergic to or intolerant of clopidogrel.

Abbreviations: CK=creatinine kinase; GFR= Glomerular Filtration Rate; MI=myocardial infarction; PCI=percutaneous coronary intervention; RCT=randomized controlled trial



**eTable 5. Additional Measurements**

| Variable                                                                                                                                                                                                                                                                                                                                                                                                                                                                                                                                                                                                                                                                                                                                                                                                                                                                                                                                                                                                                                                                                                                                                                                                                                                                                                                                                                                                                                                                                                                                                                                        | Mechanically-expanded Valve (N=607) | Self-expanding Valve (N=305) |
|-------------------------------------------------------------------------------------------------------------------------------------------------------------------------------------------------------------------------------------------------------------------------------------------------------------------------------------------------------------------------------------------------------------------------------------------------------------------------------------------------------------------------------------------------------------------------------------------------------------------------------------------------------------------------------------------------------------------------------------------------------------------------------------------------------------------------------------------------------------------------------------------------------------------------------------------------------------------------------------------------------------------------------------------------------------------------------------------------------------------------------------------------------------------------------------------------------------------------------------------------------------------------------------------------------------------------------------------------------------------------------------------------------------------------------------------------------------------------------------------------------------------------------------------------------------------------------------------------|-------------------------------------|------------------------------|
| Procedural Characteristics                                                                                                                                                                                                                                                                                                                                                                                                                                                                                                                                                                                                                                                                                                                                                                                                                                                                                                                                                                                                                                                                                                                                                                                                                                                                                                                                                                                                                                                                                                                                                                      |                                     |                              |
| TEE used during implant procedure                                                                                                                                                                                                                                                                                                                                                                                                                                                                                                                                                                                                                                                                                                                                                                                                                                                                                                                                                                                                                                                                                                                                                                                                                                                                                                                                                                                                                                                                                                                                                               | 353/596 (59.2)                      | 167/300 (55.7)               |
| Final post-deployment aortogram of the ascending aorta performed                                                                                                                                                                                                                                                                                                                                                                                                                                                                                                                                                                                                                                                                                                                                                                                                                                                                                                                                                                                                                                                                                                                                                                                                                                                                                                                                                                                                                                                                                                                                | 577/596 (96.8)                      | 284/300 (94.7)               |
| Successful vascular access, delivery and deployment of the study Valve System, and successful retrieval of the delivery system                                                                                                                                                                                                                                                                                                                                                                                                                                                                                                                                                                                                                                                                                                                                                                                                                                                                                                                                                                                                                                                                                                                                                                                                                                                                                                                                                                                                                                                                  | 583/596 (97.8)                      | 297/300 (99.0)               |
| Conversion to open heart surgery                                                                                                                                                                                                                                                                                                                                                                                                                                                                                                                                                                                                                                                                                                                                                                                                                                                                                                                                                                                                                                                                                                                                                                                                                                                                                                                                                                                                                                                                                                                                                                | 4/596 (0.7)                         | 2/300 (0.7)                  |
| TAV-in-TAV deployment performed <sup>a</sup>                                                                                                                                                                                                                                                                                                                                                                                                                                                                                                                                                                                                                                                                                                                                                                                                                                                                                                                                                                                                                                                                                                                                                                                                                                                                                                                                                                                                                                                                                                                                                    | 0/596 (0.0)                         | 7/300 (2.3)                  |
| Prosthetic aortic valve malpositioning, including valve migration, valve embolization, ectopic valve deployment                                                                                                                                                                                                                                                                                                                                                                                                                                                                                                                                                                                                                                                                                                                                                                                                                                                                                                                                                                                                                                                                                                                                                                                                                                                                                                                                                                                                                                                                                 | 0 (0.0)                             | 8 (2.7)                      |
| Valve Migration                                                                                                                                                                                                                                                                                                                                                                                                                                                                                                                                                                                                                                                                                                                                                                                                                                                                                                                                                                                                                                                                                                                                                                                                                                                                                                                                                                                                                                                                                                                                                                                 | 0 (0.0)                             | 2 (0.7)                      |
| Valve Embolization                                                                                                                                                                                                                                                                                                                                                                                                                                                                                                                                                                                                                                                                                                                                                                                                                                                                                                                                                                                                                                                                                                                                                                                                                                                                                                                                                                                                                                                                                                                                                                              | 0 (0.0)                             | 6 (2.0)                      |
| Ectopic Valve Deployment                                                                                                                                                                                                                                                                                                                                                                                                                                                                                                                                                                                                                                                                                                                                                                                                                                                                                                                                                                                                                                                                                                                                                                                                                                                                                                                                                                                                                                                                                                                                                                        | 0 (0.0)                             | 1 (0.3)                      |
| Periprocedural coronary obstruction ( $\leq 72$ h after index procedure)                                                                                                                                                                                                                                                                                                                                                                                                                                                                                                                                                                                                                                                                                                                                                                                                                                                                                                                                                                                                                                                                                                                                                                                                                                                                                                                                                                                                                                                                                                                        | 1/587 (0.2)                         | 2/297 (0.7)                  |
| Periprocedural cardiac tamponade ( $\leq 72$ h after index procedure)                                                                                                                                                                                                                                                                                                                                                                                                                                                                                                                                                                                                                                                                                                                                                                                                                                                                                                                                                                                                                                                                                                                                                                                                                                                                                                                                                                                                                                                                                                                           | 15/587 (2.6)                        | 4/297 (1.3)                  |
| 30 days                                                                                                                                                                                                                                                                                                                                                                                                                                                                                                                                                                                                                                                                                                                                                                                                                                                                                                                                                                                                                                                                                                                                                                                                                                                                                                                                                                                                                                                                                                                                                                                         |                                     |                              |
| Clinical Procedural Success at 30 days <sup>b</sup>                                                                                                                                                                                                                                                                                                                                                                                                                                                                                                                                                                                                                                                                                                                                                                                                                                                                                                                                                                                                                                                                                                                                                                                                                                                                                                                                                                                                                                                                                                                                             | 494/607 (81.4)                      | 258/305 (84.6)               |
| Procedural success at 30 days <sup>c</sup>                                                                                                                                                                                                                                                                                                                                                                                                                                                                                                                                                                                                                                                                                                                                                                                                                                                                                                                                                                                                                                                                                                                                                                                                                                                                                                                                                                                                                                                                                                                                                      | 186/582 (32.0)                      | 113/288 (39.2)               |
| Modified device success at 30 days <sup>d</sup>                                                                                                                                                                                                                                                                                                                                                                                                                                                                                                                                                                                                                                                                                                                                                                                                                                                                                                                                                                                                                                                                                                                                                                                                                                                                                                                                                                                                                                                                                                                                                 | 472/532 (88.7)                      | 231/265 (87.2)               |
| <p>Values are mean (SD) (N) or n (%). Implanted patient population. <sup>a</sup>An additional transcatheter aortic valve (TAV) prosthesis implanted within a previously implanted transcatheter valve prosthesis. <sup>b</sup>implantation of the study device in the absence of death, disabling stroke, major vascular complications, and life-threatening or major bleeding; <sup>c</sup>absence of procedural mortality, correct positioning of a single transcatheter valve into the proper anatomical location, intended performance of the study device (effective orifice area [EOA] <math>&gt;0.9</math> cm<sup>2</sup> for BSA <math>&lt;1.6</math> m<sup>2</sup> and EOA <math>&gt;1.1</math> cm<sup>2</sup> for BSA <math>\geq 1.6</math> m<sup>2</sup> plus either a mean aortic valve gradient <math>&lt;20</math> mm Hg or a peak velocity <math>&lt;3</math>m/sec, and no moderate or severe prosthetic valve aortic regurgitation) plus no serious adverse events at 30 days; <sup>d</sup>reported for patients randomized and implanted with an assigned study device and defined as follows: absence of mortality with the originally implanted transcatheter valve in the proper anatomical location, no additional aortic valve procedures, and with the intended performance of the prosthetic valve (either a mean aortic valve gradient <math>&lt;20</math> mmHg or a peak velocity <math>&lt;3</math>m/sec with no moderate or severe prosthetic valve aortic regurgitation). Abbreviations: TAV=transcatheter aortic valve; TEE= Transesophageal Echocardiography</p> |                                     |                              |

| <b>eTable 6. Antiplatelet/Anticoagulant Medications</b>                                             |                                            |                                     |
|-----------------------------------------------------------------------------------------------------|--------------------------------------------|-------------------------------------|
| <b>Timepoint and Medications</b>                                                                    | <b>Mechanically-expanded Valve (N=607)</b> | <b>Self-expanding Valve (N=305)</b> |
| <b>Baseline</b>                                                                                     |                                            |                                     |
| Aspirin and Clopidogrel or Ticlopidine or Ticagrelor or Prasugrel or Other Anti-Platelet Medication | 208 (34.3%)                                | 107 (35.1%)                         |
| Aspirin                                                                                             | 422 (69.5%)                                | 228 (74.8%)                         |
| Clopidogrel                                                                                         | 237 (39.0%)                                | 122 (40.0%)                         |
| Ticlopidine                                                                                         | 0 (0.0%)                                   | 0 (0.0%)                            |
| Ticagrelor                                                                                          | 5 (0.8%)                                   | 1 (0.3%)                            |
| Prasugrel                                                                                           | 1 (0.2%)                                   | 1 (0.3%)                            |
| Other Anti-Platelet Medication                                                                      | 5 (0.8%)                                   | 3 (1.0%)                            |
| Warfarin                                                                                            | 53 (8.7%)                                  | 17 (5.6%)                           |
| Other Anticoagulant Medication                                                                      | 32 (5.3%)                                  | 27 (8.9%)                           |
| <b>Discharge or 7 Days</b>                                                                          |                                            |                                     |
| Aspirin and Clopidogrel or Ticlopidine or Ticagrelor or Prasugrel or Other Anti-Platelet Medication | 421 (69.4%)                                | 203 (66.6%)                         |
| Aspirin                                                                                             | 515 (84.8%)                                | 250 (82.0%)                         |
| Clopidogrel                                                                                         | 471 (77.6%)                                | 232 (76.1%)                         |
| Ticlopidine                                                                                         | 0 (0.0%)                                   | 0 (0.0%)                            |
| Ticagrelor                                                                                          | 5 (0.8%)                                   | 2 (0.7%)                            |
| Prasugrel                                                                                           | 0 (0.0%)                                   | 1 (0.3%)                            |
| Other Anti-Platelet Medication                                                                      | 7 (1.2%)                                   | 3 (1.0%)                            |
| Warfarin                                                                                            | 112 (18.5%)                                | 45 (14.8%)                          |
| Other Anticoagulant Medication                                                                      | 65 (10.7%)                                 | 34 (11.1%)                          |
| <b>30 Days Post Procedure</b>                                                                       |                                            |                                     |
| Aspirin and Clopidogrel or Ticlopidine or Ticagrelor or Prasugrel or Other Anti-Platelet Medication | 358/589 (60.8%)                            | 181/296 (61.1%)                     |
| Aspirin                                                                                             | 479/589 (81.3%)                            | 239/296 (80.7%)                     |
| Clopidogrel                                                                                         | 419/589 (71.1%)                            | 212/296 (71.6%)                     |
| Ticlopidine                                                                                         | 0/589 (0.0%)                               | 0/296 (0.0%)                        |
| Ticagrelor                                                                                          | 4/589 (0.7%)                               | 2/296 (0.7%)                        |
| Prasugrel                                                                                           | 0/589 (0.0%)                               | 0/296 (0.0%)                        |
| Other Anti-Platelet Medication                                                                      | 2/589 (0.3%)                               | 4/296 (1.4%)                        |
| Warfarin                                                                                            | 125/589 (21.2%)                            | 47/296 (15.9%)                      |
| Other Anticoagulant Medication                                                                      | 45/589 (7.6%)                              | 17/296 (5.7%)                       |
| <b>6 Months Post Procedure</b>                                                                      |                                            |                                     |
| Aspirin and Clopidogrel or Ticlopidine or Ticagrelor or Prasugrel or Other Anti-Platelet Medication | 267/551 (48.5%)                            | 142/276 (51.4%)                     |
| Aspirin                                                                                             | 428/551 (77.7%)                            | 217/276 (78.6%)                     |
| Clopidogrel                                                                                         | 318/551 (57.7%)                            | 167/276 (60.5%)                     |
| Ticlopidine                                                                                         | 0/551 (0.0%)                               | 0/276 (0.0%)                        |
| Ticagrelor                                                                                          | 4/551 (0.7%)                               | 0/276 (0.0%)                        |
| Prasugrel                                                                                           | 0/551 (0.0%)                               | 0/276 (0.0%)                        |
| Other Anti-Platelet Medication                                                                      | 4/551 (0.7%)                               | 4/276 (1.4%)                        |
| Warfarin                                                                                            | 117/551 (21.2%)                            | 38/276 (13.8%)                      |
| Other Anticoagulant Medication                                                                      | 37/551 (6.7%)                              | 7.2% (20/276)                       |
| <b>1 Year Post Procedure</b>                                                                        |                                            |                                     |
| Aspirin and Clopidogrel or Ticlopidine or Ticagrelor or Prasugrel or Other Anti-Platelet Medication | 205/512 (40.0%)                            | 99/252 (39.3%)                      |

| <b>eTable 6. Antiplatelet/Anticoagulant Medications</b> |                                            |                                     |
|---------------------------------------------------------|--------------------------------------------|-------------------------------------|
| <b>Timepoint and Medications</b>                        | <b>Mechanically-expanded Valve (N=607)</b> | <b>Self-expanding Valve (N=305)</b> |
| Aspirin                                                 | 406/513 (79.1%)                            | 199/252 (79.0%)                     |
| Clopidogrel                                             | 242/512 (47.3%)                            | 114/252 (45.2%)                     |
| Ticlopidine                                             | 0/511 (0.0%)                               | 0/252 (0.0%)                        |
| Ticagrelor                                              | 3/511 (0.6%)                               | 1/252 (0.4%)                        |
| Prasugrel                                               | 0/511 (0.0%)                               | 0/252 (0.0%)                        |
| Other Anti-Platelet Medication                          | 4/511 (0.8%)                               | 4/252 (1.6%)                        |
| Warfarin                                                | 108/511 (21.1%)                            | 38/252 (15.1%)                      |
| Other Anticoagulant Medication                          | 43/512 (8.4%)                              | 20/252 (7.9%)                       |
| Values are n (%). ITT patient population.               |                                            |                                     |

**eTable 7. Hierarchical Testing of the Prespecified Safety and Effectiveness Endpoints in Alternative Patient Populations**

|                                                                             | Mechanically-expanded Valve | Self-expanding Valve | Difference (Upper Confidence Interval <sup>a</sup> ) [95% CI] | P Value |
|-----------------------------------------------------------------------------|-----------------------------|----------------------|---------------------------------------------------------------|---------|
| <i>Noninferiority Testing of Primary Endpoints</i>                          |                             |                      |                                                               |         |
| 30-day Composite Primary Safety Endpoint <sup>b</sup> (ITT)                 | 114/601 (19.0)              | 49/303 (16.2)        | 2.8 [7.75]<br>-2.4, 8.0                                       | .001    |
| 1-year Composite Primary Effectiveness Endpoint <sup>c</sup> (ITT)          | 82/520 (15.8)               | 68/262 (26.0)        | -10.2 [-4.54]<br>-16.3, -4.0                                  | <.001   |
| <i>Superiority Testing of Secondary Endpoint</i>                            |                             |                      |                                                               |         |
| 1-year Moderate or Greater PVL <sup>d</sup> (Implanted)                     | 4/443 (0.9)                 | 158/216 (6.9)        | -6.0<br>-9.5, -2.5                                            | <.001   |
| <i>Superiority Testing of Primary Effectiveness Endpoint</i>                |                             |                      |                                                               |         |
| 1-year Composite Primary Effectiveness Endpoint <sup>c, e</sup> (Implanted) | 78/506 (15.4)               | 66/259 (25.5)        | -10.1<br>-16.2, -3.9                                          | <.001   |

Values are n/N (%). Difference is shown as MEV-SEV [1-sided 97.5% Farrington-Manning Upper Confidence Interval]. Abbreviations: CI=confidence interval. Hierarchical testing of the primary and secondary endpoints was prespecified. If the null hypotheses for the primary safety and effectiveness endpoints were both rejected to show noninferiority of MEV to SEV then superiority of the secondary endpoint was tested. If the null hypothesis was rejected to show superiority of MEV to SEV then superiority of MEV to SEV for the primary effectiveness endpoint could be tested. The primary analysis set for noninferiority testing was the implanted patient population (includes all patients who signed an Informed Consent Form, were enrolled in the trial, and were implanted with the assigned, randomized study device (excludes cross-over patients); event rates were calculated post-index procedure. The primary analysis set for superiority testing was the Intention-to-Treat (ITT) patient population (includes all patients who signed an Informed Consent Form, were enrolled in the trial, and were randomized, whether or not an assigned study device was implanted; event rates are calculated post-randomization). <sup>a</sup>1-sided 97.5% Farrington-Manning Upper Confidence Interval; <sup>b</sup>Composite of all-cause mortality, stroke, life-threatening and major bleeding, stage 2 and 3 acute kidney injury and major vascular complications through 30 days. P value is from the Farrington-Manning test and is based on the standard normal distribution; between-arm difference was 2.8% and non-inferiority margin was 10.5%; <sup>c</sup>Composite of all-cause mortality, disabling stroke and moderate or greater paravalvular aortic regurgitation through 1 year. P value is from the Farrington-Manning test and is based on the standard normal distribution for the noninferiority testing; between-arm difference was -4.54% and non-inferiority margin was 9.5%; <sup>d</sup>Moderate or greater paravalvular leak based on core lab assessment; p value is from chi-square test for the superiority testing and echocardiograms with less than moderate total aortic regurgitation and visible PVL that was not gradable were included in the group with less than moderate PVL. <sup>e</sup>chi-square test in the ITT patient population for the superiority testing. Abbreviations: CI=confidence interval; ITT=intention-to-treat; PVL=paravalvular leak.

**eTable 8. Grades of aortic regurgitation or paravalvular leak presented over time**

| Variable                                                                                                                                                                                                                                                                                                                                                                                                           | Mechanically-expanded Valve | Self-expanding Valve | Difference [95% CI]     |
|--------------------------------------------------------------------------------------------------------------------------------------------------------------------------------------------------------------------------------------------------------------------------------------------------------------------------------------------------------------------------------------------------------------------|-----------------------------|----------------------|-------------------------|
| <b>Baseline<sup>a</sup></b>                                                                                                                                                                                                                                                                                                                                                                                        | <b>(n=562)</b>              | <b>(n=290)</b>       |                         |
| None                                                                                                                                                                                                                                                                                                                                                                                                               | 136 (24.2%)                 | 56 (19.3%)           | 4.9% [-0.9%, 10.6%]     |
| Trace or Trivial                                                                                                                                                                                                                                                                                                                                                                                                   | 97 (17.3%)                  | 49 (16.9%)           | 0.4% [-5.0%, 5.7%]      |
| Mild                                                                                                                                                                                                                                                                                                                                                                                                               | 289 (51.4%)                 | 161 (55.5%)          | -4.1% [-11.1%, 3.0%]    |
| Moderate                                                                                                                                                                                                                                                                                                                                                                                                           | 36 (6.4%)                   | 21 (7.2%)            | -0.8% [-4.4%, 2.8%]     |
| Moderate-Severe                                                                                                                                                                                                                                                                                                                                                                                                    | 0 (0.0%)                    | 1 (0.3%)             | -0.3% [-1.0%, 0.3%]     |
| Severe                                                                                                                                                                                                                                                                                                                                                                                                             | 0 (0.0%)                    | 1 (0.3%)             | -0.3% [-1.0%, 0.3%]     |
| AR but Severity Not Evaluable                                                                                                                                                                                                                                                                                                                                                                                      | 4 (0.7%)                    | 1 (0.3%)             | 0.4% [-0.6%, 1.3%]      |
| <b>Discharge or 7 days<sup>b</sup></b>                                                                                                                                                                                                                                                                                                                                                                             | <b>(n=553)</b>              | <b>(n=277)</b>       |                         |
| None                                                                                                                                                                                                                                                                                                                                                                                                               | 404 (73.1%)                 | 76 (27.4%)           | 45.6% [39.2%, 52.0%]    |
| Trace or Trivial                                                                                                                                                                                                                                                                                                                                                                                                   | 58 (10.5%)                  | 50 (18.1%)           | -7.6% [-12.8%, -2.4%]   |
| Mild                                                                                                                                                                                                                                                                                                                                                                                                               | 65 (11.8%)                  | 130 (46.9%)          | -35.2% [-41.6%, -28.7%] |
| Moderate                                                                                                                                                                                                                                                                                                                                                                                                           | 2 (0.4%)                    | 10 (3.6%)            | -3.2% [-5.5%, -1.0%]    |
| Moderate-Severe                                                                                                                                                                                                                                                                                                                                                                                                    | 0 (0.0%)                    | 0 (0.0%)             | 0.0% [NA, NA]           |
| Severe                                                                                                                                                                                                                                                                                                                                                                                                             | 0 (0.0%)                    | 0 (0.0%)             | 0.0% [NA, NA]           |
| Moderate or Greater                                                                                                                                                                                                                                                                                                                                                                                                | 2 (0.4%)                    | 10 (3.6%)            | -3.2% [-5.5%, -1.0%]    |
| AR but Severity Not Evaluable                                                                                                                                                                                                                                                                                                                                                                                      | 24 (4.3%)                   | 11 (4.0%)            | 0.4% [-2.5%, 3.2%]      |
| <b>30 Days Post Procedure<sup>b</sup></b>                                                                                                                                                                                                                                                                                                                                                                          | <b>(n=541)</b>              | <b>(n=265)</b>       |                         |
| None                                                                                                                                                                                                                                                                                                                                                                                                               | 392 (72.5%)                 | 65 (24.5%)           | 47.9% [41.5%, 54.3%]    |
| Trace or Trivial                                                                                                                                                                                                                                                                                                                                                                                                   | 58 (10.7%)                  | 39 (14.7%)           | -4.0% [-9.0%, 1.0%]     |
| Mild                                                                                                                                                                                                                                                                                                                                                                                                               | 58 (10.7%)                  | 129 (48.7%)          | -38.0% [-44.5%, -31.4%] |
| Moderate                                                                                                                                                                                                                                                                                                                                                                                                           | 2 (0.4%)                    | 19 (7.2%)            | -6.8% [-9.9%, -3.7%]    |
| Moderate-Severe                                                                                                                                                                                                                                                                                                                                                                                                    | 1 (0.2%)                    | 0 (0.0%)             | 0.2% [-0.2%, 0.5%]      |
| Severe                                                                                                                                                                                                                                                                                                                                                                                                             | 0 (0.0%)                    | 0 (0.0%)             | 0.0% [NA, NA]           |
| Moderate or Greater                                                                                                                                                                                                                                                                                                                                                                                                | 3 (0.6%)                    | 19 (7.2%)            | -6.6% [-9.8%, -3.4%]    |
| AR but Severity Not Evaluable                                                                                                                                                                                                                                                                                                                                                                                      | 30 (5.5%)                   | 13 (4.9)             | 0.6% [-2.6%, 3.9%]      |
| <b>6 Months Post-Procedure<sup>b</sup></b>                                                                                                                                                                                                                                                                                                                                                                         | <b>(n=471)</b>              | <b>(n=236)</b>       |                         |
| None                                                                                                                                                                                                                                                                                                                                                                                                               | 366 (77.7%)                 | 88 (37.3%)           | 40.4% [33.2%, 47.6%]    |
| Trace or Trivial                                                                                                                                                                                                                                                                                                                                                                                                   | 20 (4.2%)                   | 16 (6.8%)            | -2.5% [-6.2%, 1.2%]     |
| Mild                                                                                                                                                                                                                                                                                                                                                                                                               | 54 (11.5%)                  | 100 (42.4%)          | -30.9% [-37.8%, -24.0%] |
| Moderate                                                                                                                                                                                                                                                                                                                                                                                                           | 2 (0.4%)                    | 11 (4.7%)            | -4.2% [-7.0%, -1.5%]    |
| Moderate-Severe                                                                                                                                                                                                                                                                                                                                                                                                    | 1 (0.2%)                    | 0 (0.0%)             | 0.2% [-0.2%, 0.6%]      |
| Severe                                                                                                                                                                                                                                                                                                                                                                                                             | 0 (0.0%)                    | 0 (0.0%)             | 0.0% [NA, NA]           |
| Moderate or Greater                                                                                                                                                                                                                                                                                                                                                                                                | 3 (0.6%)                    | 11 (4.7%)            | -4.0% [-6.8%, -1.2%]    |
| AR but Severity Not Evaluable                                                                                                                                                                                                                                                                                                                                                                                      | 13 (2.8%)                   | 12 (5.1%)            | -2.3% [-5.5%, 0.8%]     |
| <b>1 Year Post-Procedure<sup>b</sup></b>                                                                                                                                                                                                                                                                                                                                                                           | <b>(n=453)</b>              | <b>(n=219)</b>       |                         |
| None                                                                                                                                                                                                                                                                                                                                                                                                               | 362 (79.9%)                 | 81 (37.0%)           | 42.9% [35.5%, 50.3%]    |
| Trace or Trivial                                                                                                                                                                                                                                                                                                                                                                                                   | 26 (5.7%)                   | 23 (10.5%)           | -4.8% [-9.4%, -0.2%]    |
| Mild                                                                                                                                                                                                                                                                                                                                                                                                               | 51 (11.3%)                  | 85 (38.8%)           | -27.6% [-34.6%, -20.5%] |
| Moderate                                                                                                                                                                                                                                                                                                                                                                                                           | 4 (0.9%)                    | 13 (5.9%)            | -5.1% [-8.3%, -1.8%]    |
| Moderate-Severe                                                                                                                                                                                                                                                                                                                                                                                                    | 0 (0.0%)                    | 2 (0.9%)             | -0.9% [-2.2%, 0.3%]     |
| Severe                                                                                                                                                                                                                                                                                                                                                                                                             | 0 (0.0%)                    | 0 (0.0%)             | 0.0% [NA, NA]           |
| Moderate or Greater                                                                                                                                                                                                                                                                                                                                                                                                | 4 (0.9%)                    | 15 (6.8%)            | -6.0% [-9.4%, -2.5%]    |
| AR but Severity Not Evaluable                                                                                                                                                                                                                                                                                                                                                                                      | 10 (2.2%)                   | 15 (6.8%)            | -4.6% [-8.3%, -1.0%]    |
| Values are n (%). ITT patient population. Only echocardiograms with gradable PVL were included. <sup>a</sup> Native valve leakage;<br><sup>b</sup> Leakage due to a separation of the prosthetic valve from the annulus; any evidence of leakage of blood around the device.<br>Graded based on Pibarot et al 2015. <sup>4</sup> Abbreviations: AR=aortic regurgitation; NA=not applicable; PVL=paravalvular leak. |                             |                      |                         |

**eTable 9. Clinical Outcomes at 30 Days and 1 Year Post Procedure in the Implanted Patient Population**

|                                                                                  | 30 days                             |                              |                      | 1 year                              |                              |                      |
|----------------------------------------------------------------------------------|-------------------------------------|------------------------------|----------------------|-------------------------------------|------------------------------|----------------------|
|                                                                                  | Mechanically-expanded Valve (N=576) | Self-expanding Valve (N=297) | Difference [95% CI]  | Mechanically-expanded Valve (N=566) | Self-expanding Valve (N=291) | Difference [95% CI]  |
| All-cause mortality or disabling stroke                                          | 28 (4.9%)                           | 17 (5.7%)                    | -0.9% [-4.0%, 2.3%]  | 74 (13.1%)                          | 51 (17.5%)                   | -4.5% [-9.6%, 0.7%]  |
| Cardiac death or disabling stroke                                                | 25 (4.3%)                           | 17 (5.7%)                    | -1.4% [-4.5%, 1.7%]  | 53 (9.4%)                           | 42 (14.4%)                   | -5.1% [-9.8%, -0.4%] |
| All-cause mortality                                                              | 18 (3.1%)                           | 8 (2.7%)                     | 0.4% [-1.9%, 2.8%]   | 65 (11.5%)                          | 38 (13.1%)                   | -1.6% [-6.3%, 3.1%]  |
| Cardiovascular                                                                   | 15 (2.6%)                           | 7 (2.4%)                     | 0.2% [-1.9%, 2.4%]   | 41 (7.2%)                           | 27 (9.3%)                    | -2.0% [-6.0%, 1.9%]  |
| Non-cardiovascular                                                               | 3 (0.5%)                            | 1 (0.3%)                     | 0.2% [-0.7%, 1.1%]   | 24 (4.2%)                           | 11 (3.8%)                    | 0.5% [-2.3%, 3.2%]   |
| Stroke                                                                           | 33 (5.7%)                           | 14 (4.7%)                    | 1.0% [-2.1%, 4.1%]   | 42 (7.4%)                           | 28 (9.6%)                    | -2.2% [-6.2%, 1.8%]  |
| Disabling                                                                        | 15 (2.6%)                           | 11 (3.7%)                    | -1.1% [-3.6%, 1.4%]  | 22 (3.9%)                           | 21 (7.2%)                    | -3.3% [-6.7%, 0.0%]  |
| Non-disabling                                                                    | 18 (3.1%)                           | 3 (1.0%)                     | 2.1% [0.3%, 3.9%]    | 21 (3.7%)                           | 7 (2.4%)                     | 1.3% [-1.0%, 3.7%]   |
| Myocardial infarction                                                            | 5 (0.9%)                            | 4 (1.3%)                     | -0.5% [-2.0%, 1.0%]  | 20 (3.5%)                           | 12 (4.1%)                    | -0.6% [-3.3%, 2.2%]  |
| Peri-procedural MI                                                               | 3 (0.5%)                            | 4 (1.3%)                     | -0.8% [-2.3%, 0.6%]  | 3 (0.5%)                            | 4 (1.4%)                     | -0.8% [-2.3%, 0.6%]  |
| Spontaneous MI                                                                   | 2 (0.3%)                            | 0 (0.0%)                     | 0.3% [-0.1%, 0.8%]   | 17 (3.0%)                           | 9 (3.1%)                     | -0.1% [-2.5%, 2.3%]  |
| Bleeding                                                                         | 74 (12.8%)                          | 34 (11.4%)                   | 1.4% [-3.1%, 5.9%]   | 100 (17.7%)                         | 50 (17.2%)                   | 0.5% [-4.9%, 5.8%]   |
| Life-threatening or disabling                                                    | 41 (7.1%)                           | 15 (5.1%)                    | 2.1% [-1.2%, 5.3%]   | 53 (9.4%)                           | 26 (8.9%)                    | 0.4% [-3.6%, 4.5%]   |
| Major bleeding                                                                   | 33 (5.7%)                           | 19 (6.4%)                    | -0.7% [-4.0%, 2.7%]  | 48 (8.5%)                           | 25 (8.6%)                    | -0.1% [-4.1%, 3.8%]  |
| Acute kidney injury <sup>a</sup>                                                 | 15 (2.7%)                           | 11 (3.7%)                    | -1.1% [-3.6%, 1.4%]  | 15 (2.7%)                           | 11 (3.8%)                    | -1.1% [-3.7%, 1.4%]  |
| Major vascular complications                                                     | 39 (6.8%)                           | 14 (4.7%)                    | 2.1% [-1.1%, 5.2%]   | 40 (7.1%)                           | 15 (5.2%)                    | 1.9% [-1.4%, 5.2%]   |
| Repeat procedure                                                                 | 0 (0.0%)                            | 3 (1.0%)                     | -1.0% [-2.1%, 0.1%]  | 1 (0.2%)                            | 6 (2.1%)                     | -1.9% [-3.6%, -0.2%] |
| Aortic valve reintervention                                                      | 0 (0.0%)                            | 2 (0.7%)                     | -0.7% [-1.6%, 0.3%]  | 0 (0.0%)                            | 5 (1.7%)                     | -1.7% [-3.2%, -0.2%] |
| Hospitalization for valve-related symptoms or worsening congestive heart failure | 11 (1.9%)                           | 13 (4.4%)                    | -2.5% [-5.0%, 0.1%]  | 62 (11.0%)                          | 41 (14.1%)                   | -3.1% [-7.9%, 1.6%]  |
| Permanent pacemaker implantation                                                 |                                     |                              |                      |                                     |                              |                      |
| All patients                                                                     | 193 (33.5%)                         | 53 (17.8%)                   | 15.7% [9.8%, 21.5%]  | 199 (35.2%)                         | 55 (18.9%)                   | 16.3% [10.3%, 22.2%] |
| Pacemaker-naïve patients                                                         | 193/470 (41.1%)                     | 53/240 (22.1%)               | 19.0% [12.1%, 25.9%] | 199/465 (42.8%)                     | 55/234 (23.5%)               | 19.3% [12.2%, 26.3%] |
| New onset of atrial fibrillation                                                 | 39 (6.8%)                           | 14 (4.7%)                    | 2.1% [-1.1%, 5.2%]   | 39 (6.9%)                           | 14 (4.8%)                    | 2.1% [-1.1%, 5.3%]   |
| Periprocedural coronary obstruction                                              | 0 (0.0%)                            | 2 (0.7%)                     | -0.7% [-1.6%, 0.3%]  | 0 (0.0%)                            | 2 (0.7%)                     | -0.7% [-1.6%, 0.3%]  |
| Periprocedural cardiac tamponade                                                 | 12 (2.1%)                           | 4 (1.3%)                     | 0.7% [-1.0%, 2.5%]   | 12 (2.1%)                           | 4 (1.4%)                     | 0.7% [-1.0%, 2.5%]   |
| Prosthetic aortic valve malpositioning <sup>b</sup>                              | 0 (0.0%)                            | 8 (2.7%)                     | -2.7% [-4.5%, -0.9%] | 0 (0.0%)                            | 8 (2.7%)                     | -2.7% [-4.6%, -0.9%] |

**eTable 9. Clinical Outcomes at 30 Days and 1 Year Post Procedure in the Implanted Patient Population**

|                                                                                                                                                                                                                                                                                                                                                                                                                                                                                                                                                                                                                                                                                                                                                                                                                                       | 30 days                             |                              |                      | 1 year                              |                              |                      |
|---------------------------------------------------------------------------------------------------------------------------------------------------------------------------------------------------------------------------------------------------------------------------------------------------------------------------------------------------------------------------------------------------------------------------------------------------------------------------------------------------------------------------------------------------------------------------------------------------------------------------------------------------------------------------------------------------------------------------------------------------------------------------------------------------------------------------------------|-------------------------------------|------------------------------|----------------------|-------------------------------------|------------------------------|----------------------|
|                                                                                                                                                                                                                                                                                                                                                                                                                                                                                                                                                                                                                                                                                                                                                                                                                                       | Mechanically-expanded Valve (N=576) | Self-expanding Valve (N=297) | Difference [95% CI]  | Mechanically-expanded Valve (N=566) | Self-expanding Valve (N=291) | Difference [95% CI]  |
| TAV-in-TAV deployment <sup>c</sup>                                                                                                                                                                                                                                                                                                                                                                                                                                                                                                                                                                                                                                                                                                                                                                                                    | 0 (0.0%)                            | 9 (3.0%)                     | -3.0% [-5.0%, -1.1%] | 0 (0.0%)                            | 11 (3.8%)                    | -3.8% [-6.0%, -1.6%] |
| Prosthetic aortic valve thrombosis                                                                                                                                                                                                                                                                                                                                                                                                                                                                                                                                                                                                                                                                                                                                                                                                    | 3 (0.5%)                            | 0 (0.0%)                     | 0.5% [-0.1%, 1.1%]   | 10 (1.8%)                           | 0 (0.0%)                     | 1.8% [0.7%, 2.9%]    |
| Prosthetic aortic valve endocarditis                                                                                                                                                                                                                                                                                                                                                                                                                                                                                                                                                                                                                                                                                                                                                                                                  | 1 (0.2%)                            | 0 (0.0%)                     | 0.2% [-0.2%, 0.5%]   | 4 (0.7%)                            | 0 (0.0%)                     | 0.7% [0.0%, 1.4%]    |
| Effective Orifice Area, cm <sup>2</sup>                                                                                                                                                                                                                                                                                                                                                                                                                                                                                                                                                                                                                                                                                                                                                                                               | 1.59 (0.46) (492)                   | 1.98 (0.51) (238)            | -0.39 [-0.47, -0.32] | 1.49 (0.45) (411)                   | 1.69 (0.52) (199)            | -0.20 [-0.28, -0.12] |
| Mean Aortic Valve Gradient, mmHg                                                                                                                                                                                                                                                                                                                                                                                                                                                                                                                                                                                                                                                                                                                                                                                                      | 12.07 (6.12) (531)                  | 7.25 (3.44) (261)            | 4.82 [4.02, 5.62]    | 12.34 (5.85) (452)                  | 7.89 (3.48) (219)            | 4.45 [3.61, 5.29]    |
| Peak Aortic Valve Gradient, mmHg                                                                                                                                                                                                                                                                                                                                                                                                                                                                                                                                                                                                                                                                                                                                                                                                      | 21.60 (10.32) (531)                 | 13.59 (6.21) (261)           | 8.02 [6.66, 9.38]    | 22.874 (10.56) (452)                | 15.22 (6.44) (219)           | 7.62 [6.10, 9.14]    |
| Peak Aortic Velocity, m/s                                                                                                                                                                                                                                                                                                                                                                                                                                                                                                                                                                                                                                                                                                                                                                                                             | 2.26 (0.46) (531)                   | 1.80 (0.40) (261)            | 0.47 [0.40, 0.53]    | 2.33 (0.51) (452)                   | 1.91 (0.41) (219)            | 0.42 [0.34, 0.50]    |
| <p>Values are mean (SD) (N) or n (%). All percentages are binary rate estimates at 30 days or one year in Implanted patients with 30-day (&gt;21 days) or 12-month (&gt;335 days) follow-up or a VARC event. Neurologic exams were performed by a neurology professional following any suspected stroke. Neurologic exams were performed by a neurology professional following any suspected stroke. <sup>a</sup>Acute kidney injury is stage 2/3 based on the AKIN System Stage.<sup>5,6</sup>; <sup>b</sup>Prosthetic aortic valve malpositioning included valve migration, valve embolization, and ectopic valve deployment. <sup>c</sup>An additional transcatheter aortic valve (TAV) prosthesis implanted within a previously implanted prosthesis. Abbreviations: MI=myocardial infarction; TAV=transcatheter aortic valve</p> |                                     |                              |                      |                                     |                              |                      |

**eTable 10. Functional status over time**

| Variable                                                                                                                                                                                                                              | Mechanically-expanded Valve (N=607) | Self-expanding Valve (N=305) | P Value |
|---------------------------------------------------------------------------------------------------------------------------------------------------------------------------------------------------------------------------------------|-------------------------------------|------------------------------|---------|
| <b>Baseline</b>                                                                                                                                                                                                                       |                                     |                              |         |
| Gait speed average to walk 5 meters (seconds)                                                                                                                                                                                         | 8.7 (5.2) (565)                     | 8.7 (4.2) (285)              | >.99    |
| NYHA Functional Class                                                                                                                                                                                                                 | <b>(n=607)</b>                      | <b>(n=305)</b>               |         |
| I                                                                                                                                                                                                                                     | 0 (0.0%)                            | 0 (0.0%)                     | .28     |
| II                                                                                                                                                                                                                                    | 174 (28.7%)                         | 98 (32.1%)                   |         |
| III                                                                                                                                                                                                                                   | 386 (63.6%)                         | 186 (61.0%)                  |         |
| IV                                                                                                                                                                                                                                    | 47 (7.7%)                           | 21 (6.9%)                    |         |
| <b>30 Days Post-Procedure</b>                                                                                                                                                                                                         |                                     |                              |         |
| NYHA Functional Class                                                                                                                                                                                                                 | <b>(n=556)</b>                      | <b>(n=276)</b>               |         |
| I                                                                                                                                                                                                                                     | 270 (48.6%)                         | 139 (50.4%)                  | .79     |
| II                                                                                                                                                                                                                                    | 233 (41.9%)                         | 104 (37.7%)                  |         |
| III                                                                                                                                                                                                                                   | 51 (9.2%)                           | 30 (10.9%)                   |         |
| IV                                                                                                                                                                                                                                    | 2 (0.4%)                            | 3 (1.1%)                     |         |
| <b>1 Year Post-Procedure</b>                                                                                                                                                                                                          |                                     |                              |         |
| Gait speed average to walk 5 meters (seconds)                                                                                                                                                                                         | 7.7 (4.2) (408)                     | 7.6 (3.4) (192)              | .77     |
| NYHA Functional Class                                                                                                                                                                                                                 | <b>(n=477)</b>                      | <b>(n=226)</b>               |         |
| I                                                                                                                                                                                                                                     | 251 (52.6%)                         | 121 (53.5%)                  | .78     |
| II                                                                                                                                                                                                                                    | 180 (37.7%)                         | 85 (37.6%)                   |         |
| III                                                                                                                                                                                                                                   | 45 (9.4%)                           | 19 (8.4%)                    |         |
| IV                                                                                                                                                                                                                                    | 1 (0.2%)                            | 1 (0.4%)                     |         |
| Values are mean (SD) (n) or n (%). Data are for the ITT population. This analysis did not include patients who died. P-value for ordinal data is from Mantel-Haenszel Chi-square test. Abbreviations: NYHA=New York Heart Association |                                     |                              |         |

Neurological status was determined by a neurological physical examination at baseline, discharge, and 1 year; National Institutes of Health Stroke Scale (NIHSS) assessment at baseline, discharge, and 1 year; and modified Rankin Scale (mRS) assessment at all time points. The neurological physical examinations were performed by a neurology professional (neurologist, neurology fellow, neurology physician assistant, or neurology nurse practitioner). The NIHSS and mRS assessments were performed by a neurology professional or certified personnel. There were no significant differences between the cohorts (eTable 11).



| <b>eTable 11. Neurological Assessment from Baseline through 1 Year Post-Procedure</b> |                                            |                                     |                |
|---------------------------------------------------------------------------------------|--------------------------------------------|-------------------------------------|----------------|
| <b>Variable</b>                                                                       | <b>Mechanically-expanded Valve (N=607)</b> | <b>Self-expanding Valve (N=305)</b> | <b>P Value</b> |
| <b>Baseline</b>                                                                       |                                            |                                     |                |
| <b>National Institutes of Health Stroke Scale (NIHSS) Total Score</b>                 | 0.39 (1.00) (593)                          | 0.41 (0.91) (301)                   | .84            |
| Neurologic Exam                                                                       |                                            |                                     |                |
| Cerebellar Function                                                                   |                                            |                                     |                |
| Normal                                                                                | 521/584 (89.2%)                            | 265/285 (93.0%)                     | .08            |
| Abnormal                                                                              | 63/584 (10.8%)                             | 20/285 (7.0%)                       |                |
| Reflexes                                                                              |                                            |                                     |                |
| Normal                                                                                | 390/581 (67.1%)                            | 198/285 (69.5%)                     | .49            |
| Abnormal                                                                              | 191/581 (32.9%)                            | 87/285 (30.5%)                      |                |
| Cranial Nerves                                                                        |                                            |                                     |                |
| Normal                                                                                | 484/584 (82.9%)                            | 236/285 (82.8%)                     | .98            |
| Abnormal                                                                              | 100/584 (17.1%)                            | 49/285 (17.2%)                      |                |
| Sensation                                                                             |                                            |                                     |                |
| Normal                                                                                | 481/584 (82.4%)                            | 237/285 (83.2%)                     | .77            |
| Abnormal                                                                              | 103/584 (17.6%)                            | 48/285 (16.8%)                      |                |
| Muscle Strength                                                                       |                                            |                                     |                |
| Normal                                                                                | 503/584 (86.1%)                            | 249/285 (87.4%)                     | .62            |
| Abnormal                                                                              | 81/584 (13.9%)                             | 36/285 (12.6%)                      |                |
| <b>Modified Rankin Scale (mRS)</b>                                                    |                                            |                                     |                |
| 0: No Symptoms                                                                        | 334/594 (56.2%)                            | 163/301 (54.2%)                     | .62            |
| 1: No Significant disability                                                          | 96/594 (16.2%)                             | 59/301 (19.6%)                      |                |
| 2: Slight disability                                                                  | 76/594 (12.8%)                             | 46/301 (15.3%)                      |                |
| 3: Moderate disability                                                                | 64/594 (10.8%)                             | 24/301 (8.0%)                       |                |
| 4: Moderately severe disability                                                       | 24/594 (4.0%)                              | 9/301 (3.0%)                        |                |
| 5: Severe disability                                                                  | 0/594 (0.0%)                               | 0/301 (0.0%)                        |                |
| <b>30 Days Post-Procedure</b>                                                         |                                            |                                     |                |
| <b>Modified Rankin Scale (mRS)</b>                                                    |                                            |                                     |                |
| 0: No Symptoms                                                                        | 349/552 (63.2%)                            | 161/275 (58.5%)                     | .09            |
| 1: No Significant disability                                                          | 85/552 (15.4%)                             | 37/275 (13.5%)                      |                |
| 2: Slight disability                                                                  | 51/552 (9.2%)                              | 33/275 (12.0%)                      |                |
| 3: Moderate disability                                                                | 46/552 (8.3%)                              | 33/275 (12.0%)                      |                |
| 4: Moderately severe disability                                                       | 18/552 (3.3%)                              | 10/275 (3.6%)                       |                |
| 5: Severe disability                                                                  | 3/552 (0.5%)                               | 1/275 (0.4%)                        |                |
| 6: Dead                                                                               | 0/552 (0.0%)                               | 0/275 (0.0%)                        |                |
| Dead without mRS                                                                      | 15/607 (2.5%)                              | 7/305 (2.3%)                        | .87            |

| <b>eTable 11. Neurological Assessment from Baseline through 1 Year Post-Procedure</b>                                                                                                                                                                                                                                                                                                                                                                                                                                                                                                                                                                                                                                                          |                                                |                                         |                |
|------------------------------------------------------------------------------------------------------------------------------------------------------------------------------------------------------------------------------------------------------------------------------------------------------------------------------------------------------------------------------------------------------------------------------------------------------------------------------------------------------------------------------------------------------------------------------------------------------------------------------------------------------------------------------------------------------------------------------------------------|------------------------------------------------|-----------------------------------------|----------------|
| <b>Variable</b>                                                                                                                                                                                                                                                                                                                                                                                                                                                                                                                                                                                                                                                                                                                                | <b>Mechanically-expanded Valve<br/>(N=607)</b> | <b>Self-expanding Valve<br/>(N=305)</b> | <b>P Value</b> |
| <b>1 Year Post-Procedure</b>                                                                                                                                                                                                                                                                                                                                                                                                                                                                                                                                                                                                                                                                                                                   |                                                |                                         |                |
| National Institutes of Health Stroke Scale (NIHSS) Total Score                                                                                                                                                                                                                                                                                                                                                                                                                                                                                                                                                                                                                                                                                 | 0.33 (0.82) (466)                              | 0.32 (0.80) (216)                       | .97            |
| Neurologic Exam                                                                                                                                                                                                                                                                                                                                                                                                                                                                                                                                                                                                                                                                                                                                |                                                |                                         |                |
| Cerebellar Function                                                                                                                                                                                                                                                                                                                                                                                                                                                                                                                                                                                                                                                                                                                            |                                                |                                         |                |
| Normal                                                                                                                                                                                                                                                                                                                                                                                                                                                                                                                                                                                                                                                                                                                                         | 395/430 (91.9%)                                | 187/204 (91.7%)                         | .93            |
| Abnormal                                                                                                                                                                                                                                                                                                                                                                                                                                                                                                                                                                                                                                                                                                                                       | 35/430 (8.1%)                                  | 17/204 (8.3%)                           |                |
| Reflexes                                                                                                                                                                                                                                                                                                                                                                                                                                                                                                                                                                                                                                                                                                                                       |                                                |                                         |                |
| Normal                                                                                                                                                                                                                                                                                                                                                                                                                                                                                                                                                                                                                                                                                                                                         | 298/428 (69.6%)                                | 137/202 (67.8%)                         | .65            |
| Abnormal                                                                                                                                                                                                                                                                                                                                                                                                                                                                                                                                                                                                                                                                                                                                       | 130/428 (30.4%)                                | 65/202 (32.2%)                          |                |
| Cranial Nerves                                                                                                                                                                                                                                                                                                                                                                                                                                                                                                                                                                                                                                                                                                                                 |                                                |                                         |                |
| Normal                                                                                                                                                                                                                                                                                                                                                                                                                                                                                                                                                                                                                                                                                                                                         | 382/430 (88.8%)                                | 177/204 (86.8%)                         | .45            |
| Abnormal                                                                                                                                                                                                                                                                                                                                                                                                                                                                                                                                                                                                                                                                                                                                       | 48/430 (11.2%)                                 | 27/204 (13.2%)                          |                |
| Sensation                                                                                                                                                                                                                                                                                                                                                                                                                                                                                                                                                                                                                                                                                                                                      |                                                |                                         |                |
| Normal                                                                                                                                                                                                                                                                                                                                                                                                                                                                                                                                                                                                                                                                                                                                         | 365/430 (84.9%)                                | 180/204 (88.2%)                         | .26            |
| Abnormal                                                                                                                                                                                                                                                                                                                                                                                                                                                                                                                                                                                                                                                                                                                                       | 65/430 (15.1%)                                 | 24/204 (11.8%)                          |                |
| Muscle Strength                                                                                                                                                                                                                                                                                                                                                                                                                                                                                                                                                                                                                                                                                                                                |                                                |                                         |                |
| Normal                                                                                                                                                                                                                                                                                                                                                                                                                                                                                                                                                                                                                                                                                                                                         | 381/430 (88.6%)                                | 181/204 (88.7%)                         | .96            |
| Abnormal                                                                                                                                                                                                                                                                                                                                                                                                                                                                                                                                                                                                                                                                                                                                       | 49/430 (11.4%)                                 | 23/204 (11.3%)                          |                |
| Modified Rankin Scale (mRS)                                                                                                                                                                                                                                                                                                                                                                                                                                                                                                                                                                                                                                                                                                                    |                                                |                                         |                |
| 0: No Symptoms                                                                                                                                                                                                                                                                                                                                                                                                                                                                                                                                                                                                                                                                                                                                 | 286/475 (60.2%)                                | 136/224 (60.7%)                         | .74            |
| 1: No Significant disability                                                                                                                                                                                                                                                                                                                                                                                                                                                                                                                                                                                                                                                                                                                   | 73/475 (15.4%)                                 | 35/224 (15.6%)                          |                |
| 2: Slight disability                                                                                                                                                                                                                                                                                                                                                                                                                                                                                                                                                                                                                                                                                                                           | 59/475 (12.4%)                                 | 20/224 (8.9%)                           |                |
| 3: Moderate disability                                                                                                                                                                                                                                                                                                                                                                                                                                                                                                                                                                                                                                                                                                                         | 45/475 (9.5%)                                  | 24/224 (10.7%)                          |                |
| 4: Moderately severe disability                                                                                                                                                                                                                                                                                                                                                                                                                                                                                                                                                                                                                                                                                                                | 11/475 (2.3%)                                  | 8/224 (3.6%)                            |                |
| 5: Severe disability                                                                                                                                                                                                                                                                                                                                                                                                                                                                                                                                                                                                                                                                                                                           | 1/475 (0.2%)                                   | 1/224 (0.4%)                            |                |
| 6: Dead                                                                                                                                                                                                                                                                                                                                                                                                                                                                                                                                                                                                                                                                                                                                        | 0/475 (0.0%)                                   | 0/224 (0.0%)                            |                |
| Dead without mRS                                                                                                                                                                                                                                                                                                                                                                                                                                                                                                                                                                                                                                                                                                                               | 70/607 (11.5%)                                 | 39/305 (12.8%)                          | .58            |
| Values are mean (SD) (n) or n (%). Data are for the ITT population. P value for ordinal data is from Mantel-Haenszel Chi-square test. mRS 0: No Symptoms at all; mRS 1: No Significant disability despite symptoms; able to carry out all usual duties and activities; mRS 2: Slight disability; unable to carry out all previous activities, but able to look after own affairs without assistance; mRS 3: Moderate disability; requiring some help, but able to walk without assistance; mRS 4: Moderately severe disability; unable to walk without assistance and unable to attend to own bodily needs without assistance; mRS 5: Severe disability; bedridden, incontinent and requiring constant nursing care and attention; mRS 6: Dead |                                                |                                         |                |

**eTable 12. Effectiveness Endpoints SEV-E vs MEV patients**

|                                                                          | <b>Mechanically-expanded Valve</b> | <b>Self-expanding Valve</b> | <b>Difference<br/>(Upper Confidence Interval<sup>a</sup>)<br/>[95% CI]</b> | <b>P Value</b> |
|--------------------------------------------------------------------------|------------------------------------|-----------------------------|----------------------------------------------------------------------------|----------------|
| 1-year Composite Primary Effectiveness Endpoint <sup>b</sup> (Implanted) | 78/506 (15.4%)                     | 25/ 123                     | -4.9% [1.5%]<br>-12.7% , 2.9%                                              | <.001          |
| 1-year Secondary Endpoint <sup>c</sup> (ITT)                             | 4/452 (0.9%)                       | 3/105 (2.9%)                | -2.0%<br>-5.3% , 1.3%                                                      | .13            |

Values are n/N (%). Difference is shown as MEV-SEV [1-sided 97.5% Farrington-Manning Upper Confidence Interval]. Abbreviations: CI=confidence interval; ITT=intention-to-treat. The implanted patient population includes all patients who signed an Informed Consent Form, were enrolled in the trial, and were implanted with the assigned, randomized study device (excludes cross-over patients); event rates were calculated post-index procedure. The Intention-to-Treat (ITT) patient population includes all patients who signed an Informed Consent Form, were enrolled in the trial, and were randomized, whether or not an assigned study device was implanted; event rates are calculated post-randomization. <sup>a</sup>1-sided 97.5% Farrington-Manning Upper Confidence Interval; <sup>b</sup>Composite of all-cause mortality, disabling stroke and moderate or greater paravalvular aortic regurgitation through 1 year. P value is from the Farrington-Manning test and is based on the standard normal distribution for the noninferiority testing; between-arm difference was 1.5% and non-inferiority margin was 9.5%; <sup>c</sup>Moderate or greater paravalvular leak based on core lab assessment; p value is from chi-square test for the superiority testing and echocardiograms with less than moderate total aortic regurgitation and visible PVL that was not gradable were included in the group with less than moderate PVL; chi-square test in the ITT patient population for the superiority testing. Abbreviations: CI=confidence intervals; ITT=intention-to-treat.

**eTable 13. Paravalvular Leak in SEV-E vs MEV patients**

| <b>Outcomes Through 1 Year Post-Procedure</b> | <b>Mechanically-expanded Valve</b> | <b>Self-expanding Valve - EvolutR</b> | <b>Difference [95% CI]</b> |
|-----------------------------------------------|------------------------------------|---------------------------------------|----------------------------|
| <b>Aortic Regurgitation<sup>a</sup></b>       |                                    |                                       |                            |
| <b>Baseline</b>                               | <b>(n=529)</b>                     | <b>(n=135)</b>                        |                            |
| None                                          | 133 (25.1%)                        | 27 (20.0%)                            | 5.1% [ -2.6% , 12.8% ]     |
| Trace/Trivial                                 | 89 (16.8%)                         | 34 (25.2%)                            | -8.4% [ -16.3% , -0.4% ]   |
| Mild                                          | 274 (51.8%)                        | 68 (50.4%)                            | 1.4% [ -8.0% , 10.9% ]     |
| Moderate                                      | 33 (6.2%)                          | 5 (3.7%)                              | 2.5% [ -1.3% , 6.3% ]      |
| Moderate-Severe                               | 0 (0.0%)                           | 1 (0.7%)                              | -0.7% [ -2.2% , 0.7% ]     |
| Severe                                        | 0 (0.0%)                           | 0 (0.0%)                              | NE                         |
| <b>Paravalvular Leak<sup>b</sup></b>          |                                    |                                       |                            |
| <b>Discharge or 7 Days</b>                    | <b>(n=517)</b>                     | <b>(n=134)</b>                        |                            |
| None                                          | 402 (77.8%)                        | 33.6% ( 45/ 134)                      | 44.2% [ 35.4% , 52.9% ]    |
| Trace/Trivial                                 | 52 (10.1%)                         | 17.9% ( 24/ 134)                      | -7.9% [ -14.8% , -0.9% ]   |
| Mild                                          | 61 (11.8%)                         | 45.5% ( 61/ 134)                      | -33.7% [ -42.6% , -24.8% ] |
| Moderate                                      | 2 (0.4%)                           | 3.0% ( 4/ 134)                        | -2.6% [ -5.5% , 0.3% ]     |
| Moderate-Severe                               | 0 (0.0%)                           | 0 (0.0%)                              | NE                         |
| Severe                                        | 0 (0.0%)                           | 0 (0.0%)                              | NE                         |
| <b>30 Days</b>                                | <b>(n=497)</b>                     | <b>(n=124)</b>                        |                            |
| None                                          | 387 (77.9%)                        | 36 (29.0%)                            | 48.8% [ 40.1% , 57.6% ]    |
| Trace/Trivial                                 | 54 (10.9%)                         | 17 (13.7%)                            | -2.8% [ -9.5% , 3.8% ]     |
| Mild                                          | 54 (10.9%)                         | 65 (52.4%)                            | -41.6% [ -50.8% , -32.3% ] |
| Moderate                                      | 1 (0.2%)                           | 6 (4.8%)                              | -4.6% [ -8.4% , -0.8% ]    |
| Moderate-Severe                               | 1 (0.2%)                           | 0 (0.0%)                              | 0.2% [ -0.2% , 0.6% ]      |
| Severe                                        | 0 (0.0%)                           | 0 (0.0%)                              | NE                         |
| <b>6 Month</b>                                | <b>(n=436)</b>                     | <b>(n=102)</b>                        |                            |
| None                                          | 362 (83.0%)                        | 40 (39.2%)                            | 43.8% [ 33.7% , 53.9% ]    |
| Trace/Trivial                                 | 19 (4.4%)                          | 9 (8.8%)                              | -4.5% [ -10.3% , 1.4% ]    |
| Mild                                          | 52 (11.9%)                         | 50 (49.0%)                            | -37.1% [ -47.3% , -26.9% ] |
| Moderate                                      | 2 (0.5%)                           | 3 (2.9%)                              | -2.5% [ -5.8% , 0.9% ]     |
| Moderate-Severe                               | 1 (0.2%)                           | 0 (0.0%)                              | 0.2% [ -0.2% , 0.7% ]      |
| Severe                                        | 0 (0.0%)                           | 0 (0.0%)                              | NE                         |
| <b>12 Month</b>                               | <b>(n=434)</b>                     | <b>(n=99)</b>                         |                            |
| None                                          | 357 (82.3%)                        | 44 (44.4%)                            | 37.8% [ 27.4% , 48.2% ]    |
| Trace/Trivial                                 | 25 (5.8%)                          | 8 (8.1%)                              | -2.3% [ -8.1% , 3.5% ]     |
| Mild                                          | 48 (11.1%)                         | 44 (44.4%)                            | -33.4% [ -43.6% , -23.2% ] |
| Moderate                                      | 4 (0.9%)                           | 3 (3.0%)                              | -2.1% [ -5.6% , 1.4% ]     |
| Moderate-Severe                               | 0 (0.0%)                           | 0 (0.0%)                              | NE                         |
| Severe                                        | 0 (0.0%)                           | 0 (0.0%)                              | NE                         |

Values are n (%). ITT patient population. The SEV-E group only includes patients treated with EvolutR. NE = non-evaluable; Only echocardiograms with gradable PVL were included. <sup>a</sup>Aortic regurgitation; <sup>b</sup>Leakage due to a separation of the prosthetic valve from the annulus; any evidence of leakage of blood around the device. Graded based on Pibarot et al 2015.<sup>1</sup>

**eFigure 1. Missing Data Sensitivity Analysis for the 1-Year Primary Effectiveness Endpoint for Non-inferiority Testing**

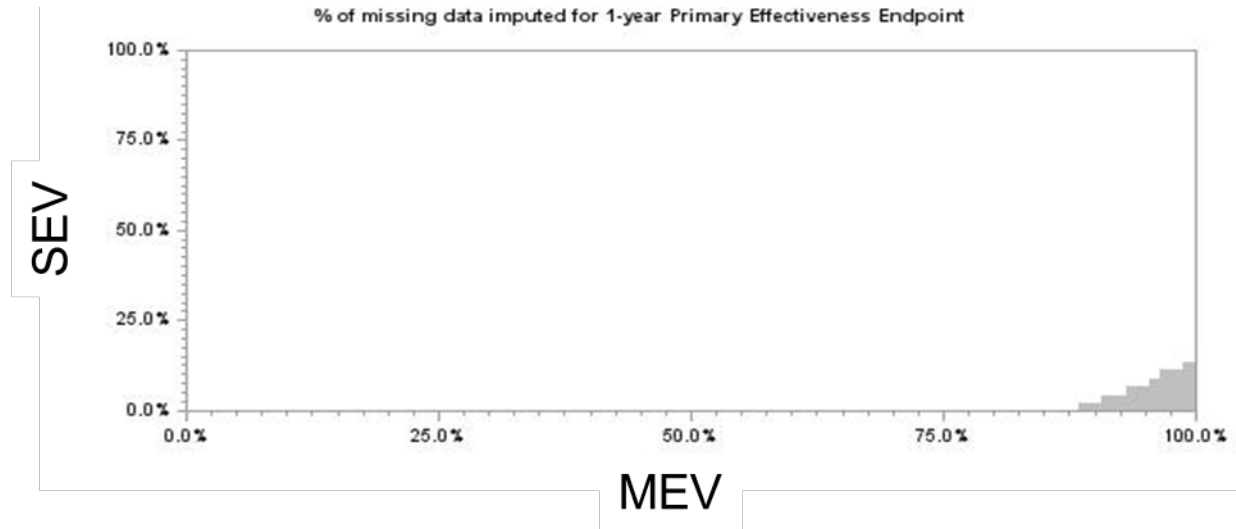

The white area indicates p value >.025; the grey area indicates p≤.025. Abbreviations: MEV=mechanically-expandable valve; SEV=self-expanding valve

**eFigure 2. Missing Data Sensitivity Analysis for the 1-Year Primary Effectiveness Endpoint for Superiority Testing**

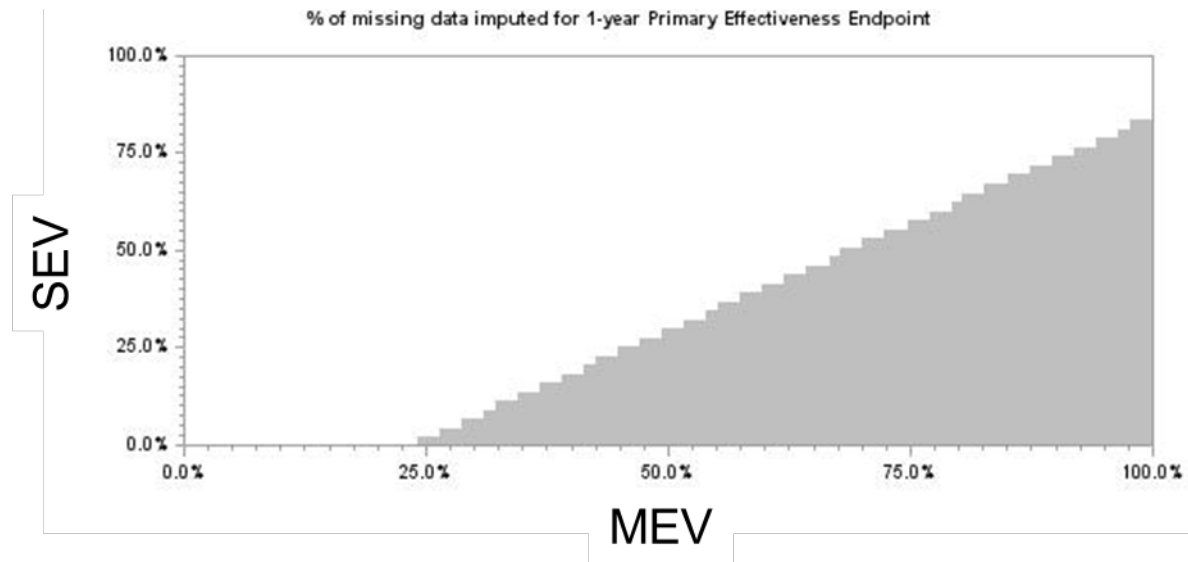

The white area indicates p value >.05; the grey area indicates p ≤.05. Abbreviations: MEV=mechanically-expandable valve; SEV=self-expanding valve

**eFigure 3. Patient Flow for the Secondary Endpoint Superiority Comparison**

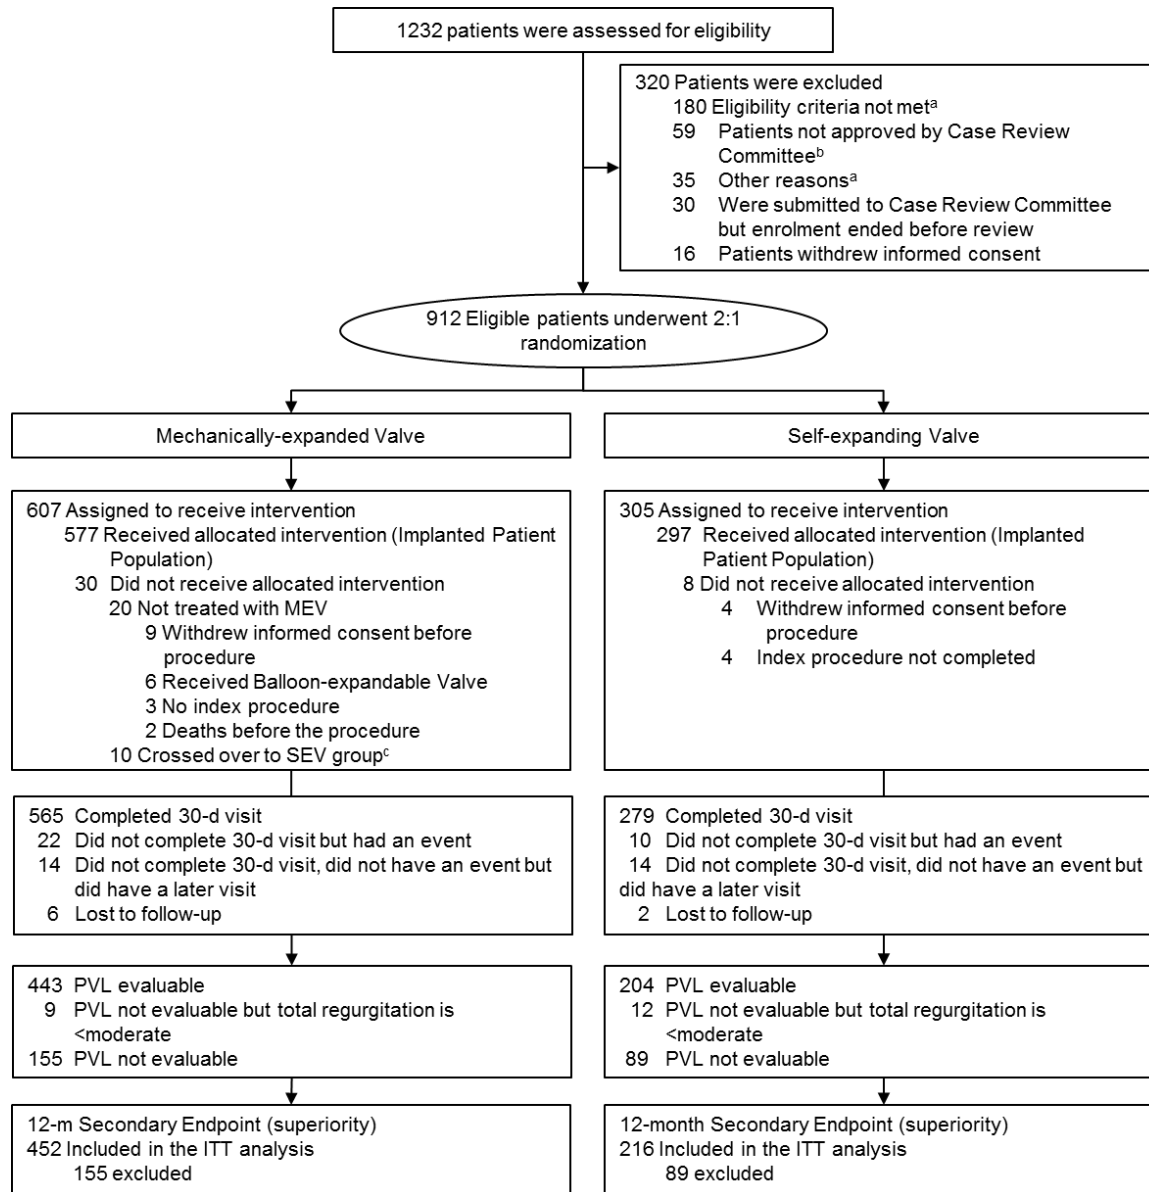

a: No additional information is available; b: Clinical Review Committee was responsible for the review of patient screening data to confirm eligibility given the increased surgical risk of the patient population being studied and to ensure consistency of patients enrolled across study centers; 24 had aortic structures that were too large; 12 patients had aortic structures that were too small; 12 had peripheral vessels that were too small, and the rest were a mix of patients who had bicuspid valve, excessive aortic tortuosity or did not meet the risk criteria; c: Patients who crossed over were included in the Intention-to-Treat analysis set but were not included in the Implanted Analysis Set; Intention-to-Treat (ITT): includes all subjects who signed an Informed Consent Form, were enrolled in the trial, and were randomized, whether or not an assigned study device was implanted. Event rates are calculated post-randomization. The ITT patient population was the prespecified analysis population for superiority testing.

## eReferences

1. Cesari M, Kritchevsky SB, Penninx BW, et al. Prognostic value of usual gait speed in well-functioning older people--results from the Health, Aging and Body Composition Study. *J Am Geriatr Soc.* 2005;53(10):1675-1680. doi:10.1111/j.1532-5415.2005.53501.x.
2. Green CP, Porter CB, Bresnahan DR, Spertus JA. Development and evaluation of the Kansas City Cardiomyopathy Questionnaire: a new health status measure for heart failure. *J Am Coll Cardiol.* 2000;35(5):1245-1255.
3. Ware JE, Kosinski M, Keller SD. A 12-item Short-Form Health Survey: Construction of scales and preliminary test of reliability and validity. *Med Care.* 1996;34:220-226.
4. Pibarot P, Hahn RT, Weissman NJ, Monaghan MJ. Assessment of Paravalvular Regurgitation Following TAVR. *JACC Cardiovasc Imaging.* 2015;8(3):340-360. doi:10.1016/j.jcmg.2015.01.008.
5. Bellomo R, Ronco C, Kellum JA, Mehta RL, Palevsky P. Acute renal failure – definition, outcome measures, animal models, fluid therapy and information technology needs: the Second International Consensus Conference of the Acute Dialysis Quality Initiative (ADQI) Group. *Crit Care.* 2004;8(4):R204-R212. doi:10.1186/cc2872.
6. Mehta RL, Kellum JA, Shah SV, et al. Acute Kidney Injury Network: report of an initiative to improve outcomes in acute kidney injury. *Crit Care.* 2007;11(2):R31. doi:10.1186/cc5713.
